# Supplementary material for: Guidelines for Neuroprognostication in Comatose Adult Survivors of Cardiac Arrest
Source: Springer Nature journal article supplement (doi:10.1007/s12028-023-01688-3), 2023-03-22
Supplement: MOESM1 [file 12028_2023_1688_MOESM1_ESM.pdf]

## Supplementary appendix 1

### Neurocritical Care Society (NCS) and Deutsche Gesellschaft für Neurointensivmedizin (DGN)

#### Neuroprognostication guidelines: Methodology

##### How to use these guidelines

These guidelines provide recommendations on the reliability of selected individual clinical variables and prediction models (both hereafter referred to as “predictors”). These predictors have been categorized as reliable, moderately reliable, or not reliable. We based this categorization on the GRADE criteria supporting the use of the predictor in the context of counseling, as well as effect size. This categorization led to the recommendation to either use or not use the predictor to formulate a prognosis, caveats to the use of the predictor, and suggested language during counseling (**Table 1**, at the end of this document).

A key distinction exists between a *reliable* predictor of outcome in the context of counseling surrogates of patients requiring neurocritical care and an *independent* predictor of outcome. An independent predictor fulfills one criterion—a statistically significant association with the outcome of interest in an appropriately conducted multivariate analysis. In clinical practice, independent predictors of outcome may be used in risk stratification, selection of patients for targeted treatment (such as chemotherapy regimens for cancer), or as building blocks of clinical prediction models.[1, 2] A reliable predictor in the context of counseling patients requiring neurocritical care or their family members must be independent, but also fulfil other criteria as described in the “Effect size (Predictor accuracy)” and “Evidence to Recommendation (EtoR)” sections.

**Reliable** predictors, for the purposes of these guidelines, may be used to formulate a prognosis when the appropriate clinical context is present in the absence of potential confounders. These are predictors with clear actionable thresholds or clinical/ radiographic definitions, and a low rate of error in prediction of poor outcomes and with at least moderate certainty in the body of evidence using GRADE criteria. When the prognosis is formulated on the basis of one or more reliable predictors the clinician may describe the outcome as “very likely” during counseling. Given the inherent limitations in

neuroprognostication research, the clinician must nevertheless acknowledge the presence of uncertainty- albeit low- in the prognosis. **Moderately reliable individual predictors** may be used for prognostication only when additional reliable or moderately reliable predictors are present, in addition to the appropriate clinical context as specified above. These are also predictors with clear, actionable thresholds or clinical/ radiographic definitions, and a low rate of error in prediction of poor outcomes, but with lower certainty in the body of evidence using GRADE criteria, often a result of smaller studies that result in imprecision. When the prognosis is formulated on the basis of multiple moderately reliable predictors the clinician may describe the outcome as “likely” during counseling, but must acknowledge “substantial” uncertainty in the prognosis. **Moderately reliable clinical prediction models** that generate predicted probabilities of outcomes, in contrast, may be used for prognostication during counseling in the absence of other reliable or moderately reliable predictors. However, it is recommended that the clinician describe the predicted probability of the outcome as “an objective estimate only, subject to considerable uncertainty”. While the panelists recognize that predictors that do not meet the criteria to be described as reliable or moderately reliable are often used by clinicians in formulating their subjective impressions of prognosis, they have nevertheless been deemed **not reliable** for the purposes of these guidelines and cannot be formally recommended for prognostication on their own. Variables deemed not reliable however may be a component of reliable or moderately reliable prediction models.

### **Guideline panel**

The NCS and DGNI recruited 20 professionals in neurocritical care, nursing, and pharmacy to create a panel of experts for the neurocritical condition considered; including a NCS-assigned GRADE methodologist in 2018. The guideline panel consisted of two to four content experts who served as the primary authors for each disease, an affected patient or family member who served as the public representative, and the content experts of the other seven disease states which included the two chairs of the entire neuroprognostication guidelines. The inclusion of neurointensivists, neurosurgeons, advanced practice providers (nurse practitioners), pharmacists, and a neuropalliative care expert on the guideline panel created a multidisciplinary collaboration. A statistician-epidemiologist with expertise in

neuroprognostication and medical decision making served as a consultant. The panel convened in monthly video-conferences, with in-person meetings at two consecutive annual meetings of the NCS and one annual meeting of DGNI. Additional small group video and telephone meetings occurred ad hoc among content experts, the chairs, the GRADE expert, and the public representative. Recommendations were voted on using online survey software (Google Forms, Google Inc., Mountain View, California, United States). Panelists were required to disclose all potential conflicts of interest prior to participation. Potential conflicts were reviewed by the co-chairs of the panel, as well as the NCS guidelines committee, and managed in accordance with policies of NCS.

### **Selection of guideline questions**

An initial Patient, Intervention, Comparison, Outcome and Time (PICOTS) question was framed to help identify candidate predictors: *“What are the reliable predictors (prognostic factors, variables, tests, scores, and multivariable models), prior to and on admission as well as during the hospital course to predict patient outcome at different follow up time points following each specific disease?”*. A professional librarian executed a comprehensive literature search using search criteria appropriate to this initial question. Since this search was expected to generate a large volume of articles, additional criteria were used to select studies with a focus on reliability of predictors and appropriate outcomes. These criteria are described below in the “systematic review methodology” section. The content experts reviewed the full-text articles that fulfilled selection criteria. Candidate predictors were then selected by these experts and confirmed by the panel, based on clinical relevance, availability in daily clinical practice, AND the presence of an appropriate body of literature. Candidate predictors and prediction models were considered “clinically relevant” if, in the subjective opinion of the content experts and guideline chairs, the predictor or components of the prediction models were accessible to clinicians; although universal availability was not required AND likely to be considered by clinicians while formulating a prognosis. An appropriate body of literature was considered present for any predictor that fulfilled two criteria—1)

evaluated in at least two published studies that included a minimum of 35-100 subjects (number of patients required was dependent on the disease state: 35 for Guillain-Barré Syndrome; 50 for spinal cord injury and status epilepticus; 100 for cardiac arrest, traumatic brain injury, acute ischemic stroke, intracerebral hemorrhage, and subarachnoid hemorrhage) and 2) established as an independent predictor in a multivariate analysis. An appropriate body of literature was considered present for clinical prediction models with at least one external validation study of at least 35-100 patients (dependent on the disease state as above) in addition to the initial report on development of the model (also with a minimum of 35-100 patients).

### **Selection of outcomes**

Outcomes relevant to the question and each disease were identified by the panel, then rated by the primary content experts and the public representative. The outcomes were rated using the GRADE 1-9 scale and the score averaged. An outcome with an average score of greater than 6 was considered “critical” and included in the evaluation. The range of outcomes and the time period of outcome assessment was specific for each disease. The only outcomes included at the time of discharge from the acute care facility were mortality at discharge and beyond for most disease states and the need for mechanical ventilation with 14 days of onset of Guillain-Barré-Syndrome. Other outcomes considered were required to be assessed after a disease-specific longer time period for recovery and beyond. While a longer duration from time of injury to outcome assessment is ideal to capture the entirety of functional recovery, this prioritization may result in loss to follow-up. Significant loss to follow-up in observational studies may result in a selection bias, based on the patients most likely to respond or return to the index hospital for further medical care.

### **Systematic review methodology**

Since the literature on prognosis was expected to be heterogenous, a narrative systematic review was performed. As described earlier, the initial librarian search string was appropriate to the question “*What*

*are the reliable predictors (prognostic factors, variables, tests, scores, and multivariable models), prior to and on admission as well as during the hospital course to predict patient outcome at different follow up time points following each specific disease ?”*, to identify candidate predictors. Screening of articles was completed using DistillerSR software (Evidence Partners, Ottawa, Canada).

Abstract screening (Level I) was performed with the question “Does this study address prognostication in the focus disease (Yes/ No)?”. Pediatric (<16 years) and animal studies were excluded, as were studies evaluating the efficacy of a therapeutic intervention.

Full text screening (Level II) was performed with the following exclusion criteria:

- Sample size less than 35/50/100 patients depending on the prevalence of the disease,
- Studies confined to a mild form the disease,
- Studies focused on a highly selected subgroup (for example penetrating traumatic brain injury, traumatic cardiac arrest, paraneoplastic Guillain-Barré-Syndrome, etc.),
- Studies focused entirely on genetic polymorphism,
- Studies that include multiple disease states and without an adequate sample size and separate analysis of the disease of interest,
- Studies of an intervention,
- Studies with neuroimaging not consistent with contemporary standards used to confirm the diagnosis,
- Studies that did not include one of the selected outcomes for the specific disease,
- Studies of predictors not established as independent with appropriate multivariate analysis,
- Studies of clinical prediction models that did not report model discrimination,
- Studies of laboratory biomarkers were included only if the biomarker was considered clinically relevant, and had been evaluated in more than one published study that met other criteria.

Data extraction and assessment for risk of bias (RoB) and was then performed only for studies that addressed the PICOTS question for each selected candidate predictor AND fulfilled full-text selection criteria. The Quality in Prognostic Studies (QUIPS) RoB instrument was used to evaluate studies of individual prognostic variables,[3] and the Prediction model Risk Of Bias ASsessment Tool (PROBAST) instrument used to evaluate studies of clinical prediction models.[4, 5] In addition to the standard domains of these RoB instruments, studies were evaluated for the risk of bias related to the self-filling prophecy with an additional domain that included three questions- whether a treatment suspension policy was used in the study, whether clinicians were blinded to the predictor and whether the predictor was systematically utilized by clinicians for prognostication during the time period of the study. Following assessment of risk of bias in each domain, an overall risk of bias- *high, moderate or low*- was assigned to each study.

Following data extraction and assessment of risk of bias of individual studies, a GRADE evidence profile with summary of findings table was constructed. Statistical measures of effect size varied across studies and were recorded in narrative form in the summary of findings. Decisions to downgrade the body of evidence for risk were based on review of risk of bias across all individual studies for the PICOTS question. The body of evidence for a specific predictor was downgraded for inconsistency only when the results of studies with approximately equal risk of bias were in conflict, with some studies suggesting the predictor was reliable and other studies showing a lack of statistical significance or a high rate of error. The evidence was downgraded for indirectness when population, predictor, outcome, or time of assessment varied significantly from the specifications of the PICOTS question. Downgrading of the evidence for imprecision was applied when the estimated confidence intervals were thought to be excessive for the clinical question. Publication bias could not be meaningfully evaluated, and the GRADE reasons to upgrade were not thought to be applicable to this body of evidence. Judgments on risk of bias, indirectness, inconsistency and imprecision were inherently subjective and focused on the respective prognostication question.

#### **Effect size (Predictor accuracy)**

Predictor accuracy is often described using measures such as the odds ratio (OR), which measures the *relative* probability of the outcome when the predictor is present, compared to the probability of the outcome in the absence of the predictor. In the context of neuroprognostication, predictors of good and poor outcomes are considered. However, the absolute probability of the outcome when the predictor is present is also important. For example, an older patient may be statistically more likely to suffer a poor outcome than a younger patient, but a large proportion of older individuals may nevertheless have a good outcome.[6] While surrogates of neurocritical care patients may be interested in factors that increase the probability of poor outcome, the absolute probability of a poor outcome is most likely used to make decisions on escalation or withdrawal of treatment measures. The performance of a clinical prediction model is evaluated using its ability to discriminate binary (good vs poor) outcomes, with measures such as the c-statistic or area under the receiver operating characteristic curve (AUC). Another important measure is model calibration, or the ability to correctly specify the probability of an outcome. Model calibration is typically reported as a goodness of fit, often using the Hosmer-Lemeshow test, or with a calibration curve, slope or intercept.[7]

### **Evidence to recommendation criteria**

The GRADE Evidence-to-Recommendation criteria encompassed the overall quality of evidence, balance between desirable and undesirable outcomes, confidence in values and preferences, and resource use. Common principles were established for each disease state by the guideline panel in consultation with the patient or family representative, when considering these criteria.

### **Good practice statements**

During literature review, the content experts recognized a lack of direct evidence to support the response to the PICOTS question for the specific disease, often because of insufficient clinical equipoise. Therefore, the panel decided to provide good clinical practice statements. Explicit statement of these clinical practice principles was considered essential to provide context as well as appropriate guidance.

## REFERENCES:

1. Hemingway, H., Croft, P., Perel, P., et al. Prognosis research strategy (PROGRESS) 1: a framework for researching clinical outcomes. *BMJ* 2013;346:e5595.
2. Riley, R.D., Hayden, J.A., Steyerberg, E.W., et al. Prognosis Research Strategy (PROGRESS) 2: prognostic factor research. *PLoS Med* 2013;10(2):e1001380.
3. Hayden, J.A., van der Windt, D.A., Cartwright, J.L., Cote, P., Bombardier, C. Assessing bias in studies of prognostic factors. *Ann Intern Med* 2013;158(4):280-6.
4. Moons, K.G.M., Wolff, R.F., Riley, R.D., et al. PROBAST: A Tool to Assess Risk of Bias and Applicability of Prediction Model Studies: Explanation and Elaboration. *Ann Intern Med* 2019;170(1):W1-W33.
5. Wolff, R.F., Moons, K.G.M., Riley, R.D., et al. PROBAST: A Tool to Assess the Risk of Bias and Applicability of Prediction Model Studies. *Ann Intern Med* 2019;170(1):51-8.
6. Gattellari, M., Goumas, C., Garden, F., Worthington, J.M. Relative survival after transient ischaemic attack: results from the Program of Research Informing Stroke Management (PRISM) study. *Stroke* 2012;43(1):79-85.
7. Van Calster, B., McLernon, D.J., van Smeden, M., et al. Calibration: the Achilles heel of predictive analytics. *BMC Med* 2019;17(1):230.



Table 1: Reliable and moderately reliable predictors

| Category of predictor/model                    | GRADE criteria          |                         |                         |                         |                             | Point estimate of accuracy in the body of evidence | Use during counseling of patients or surrogates ? | Presence of additional specific reliable or moderately predictors required for use during counseling ? | Suggested language during counseling of patients or surrogates |                                                                                 |
|------------------------------------------------|-------------------------|-------------------------|-------------------------|-------------------------|-----------------------------|----------------------------------------------------|---------------------------------------------------|--------------------------------------------------------------------------------------------------------|----------------------------------------------------------------|---------------------------------------------------------------------------------|
|                                                | Risk of Bias            | Inconsistency           | Imprecision             | Indirectness            | Quality of Evidence-Overall |                                                    |                                                   |                                                                                                        | Likelihood of outcome                                          | Disclaimer of Uncertainty during counseling                                     |
| Reliable                                       | One downgrade permitted | Downgrade NOT permitted | Downgrade NOT permitted | Downgrade NOT permitted | Moderate or High            | High                                               | Yes                                               | Preferred, but not absolutely required                                                                 | “Very likely”                                                  | Present, but low                                                                |
| Moderately reliable individual predictors      | One downgrade permitted | Downgrade NOT permitted | One downgrade permitted | One downgrade permitted | Any                         | High                                               | Yes                                               | Yes                                                                                                    | “Likely”                                                       | Substantial                                                                     |
| Moderately reliable clinical prediction models | One downgrade permitted | Downgrade NOT permitted | One downgrade permitted | One downgrade permitted | Any                         | High.                                              | Yes                                               | No                                                                                                     | Use predicted probability of outcome                           | “The predicted probability is an estimate, subject to considerable uncertainty” |
| Not reliable                                   | One downgrade permitted | Downgrade NOT permitted | One downgrade permitted | One downgrade permitted | Any                         | Any                                                | *No                                               | Not applicable                                                                                         | Not applicable                                                 | Not applicable                                                                  |

- \* Many predictors designated “not reliable” are practically utilized by clinicians in formulating and communicating real-world subjective impressions of prognosis. The purpose of these guidelines is to identify predictors, if any, that meet reliable or moderately reliable criteria.

## Supplementary Appendix 2

### GRADE Evidence Profile/ Summary of Findings table: Neuroprognostication- Cardiac arrest

#### Individual predictors- Mortality

| Outcome   | Predictor                                                                                  | Quality of Evidence |               |              |             |                             | Summary of Findings<br>(Narrative of effect size)                                                                                                            |
|-----------|--------------------------------------------------------------------------------------------|---------------------|---------------|--------------|-------------|-----------------------------|--------------------------------------------------------------------------------------------------------------------------------------------------------------|
|           |                                                                                            | Risk of Bias        | Inconsistency | Indirectness | Imprecision | Quality of Evidence-Summary |                                                                                                                                                              |
| Mortality | Age                                                                                        | ↓↓                  | ↓             |              |             | Very low                    | Point estimate of odds ratio for poor outcome 1.02 – 2.23.<br>Point estimate of odds ratio for survival 0.78-0.97                                            |
| Mortality | Cardiac rhythm-nonshockable                                                                | ↓↓                  | ↓             |              |             | Very low                    | Point estimate of odds ratio for poor outcome 1.4 – 3.65. False positive rate 16%                                                                            |
| Mortality | Time to return of spontaneous circulation                                                  | ↓↓                  | ↓             |              |             | Very low                    | Point estimate of odds ratio for poor outcome 1.03 – 1.10.<br>False positive rate 24%.                                                                       |
| Mortality | Neurological examination ≥ 72 hours from ROSC - Bilateral absence of the pupillary reflex. | ↓↓                  |               |              | ↓           | Very low                    | Point estimate of odds ratio for poor outcome 2.53-10.20 for the pupillary reflex. Insufficient evidence for the corneal reflex as a predictor of mortality. |
| Mortality | Neurological examination ≥ 72 hours from ROSC - Motor response                             | ↓↓                  |               |              |             | Low                         | False positive rate 0-24%.                                                                                                                                   |
| Mortality | Myoclonus ≤ 48 hours from ROSC                                                             |                     |               |              |             |                             | Insufficient evidence                                                                                                                                        |
| Mortality | Computed Tomography (CT) ≥ 72 hours from ROSC- quantification of grey white ratio          |                     |               |              |             |                             | Insufficient evidence                                                                                                                                        |
| Mortality | Magnetic Resonance Imaging (MRI)- quantification of ADC 2-7 days from ROSC.                |                     |               |              |             |                             | Insufficient evidence                                                                                                                                        |
| Mortality | Electro-encephalography (EEG) ≥ 72                                                         |                     |               |              |             |                             | Insufficient evidence                                                                                                                                        |

|           |                                                                                                      |    |   |  |  |          |                                                                        |
|-----------|------------------------------------------------------------------------------------------------------|----|---|--|--|----------|------------------------------------------------------------------------|
|           | hours from ROSC with suppressed or burst suppression background, with or without periodic discharges |    |   |  |  |          |                                                                        |
| Mortality | Somatosensory evoked potential (SSEP)                                                                |    |   |  |  |          | Insufficient evidence                                                  |
| Mortality | Neuron Specific Enolase (NSE)                                                                        | ↓↓ | ↓ |  |  | Very low | AUC 0.81-0.88. False positive rate 27% for NSE>33 and 15% for NSE>47.8 |

### **Prediction models- Mortality**

| Outcome   | Prediction models | Quality of Evidence |               |              |             |                                             | Summary of Findings ( <u>Narrative of effect size</u> )                                                                                                                                                                            |
|-----------|-------------------|---------------------|---------------|--------------|-------------|---------------------------------------------|------------------------------------------------------------------------------------------------------------------------------------------------------------------------------------------------------------------------------------|
|           |                   | RoB                 | Inconsistency | Indirectness | Imprecision | QoE-Summary (High/ Moderate/ Low/ Very Low) |                                                                                                                                                                                                                                    |
| Mortality | OHCA              | ↓                   |               |              |             | Moderate                                    | AUC 0.79-0.85. OHCA score >60: Sensitivity about 2%, Specificity 100% for mortality. No evidence of miscalibration when reported.                                                                                                  |
| Mortality | CAHP              | ↓                   |               |              |             | Moderate                                    | AUC 0.81-0.84. CAHP >200: Sensitivity about 39%, Specificity about 91% for mortality. No evidence of miscalibration when reported.                                                                                                 |
| Mortality | GOFAR             | ↓                   |               |              |             | Moderate                                    | Insufficient evidence- no studies with calibration reported. Single study reported that in patients with GOFAR ≥ 24 (Very low survival)- 3/60 (5%) survived. Among patients with GOFAR 14–23 (Low survival)- 5/90 (5.5%) survived. |

## Summary of recommendations- predictors of MORTALITY

| Predictors of MORTALITY at discharge or later                                                                                                                                                                                                                                                                                                                                                                                 |
|-------------------------------------------------------------------------------------------------------------------------------------------------------------------------------------------------------------------------------------------------------------------------------------------------------------------------------------------------------------------------------------------------------------------------------|
| Age, Cardiac Rhythm & Time to return of spontaneous circulation                                                                                                                                                                                                                                                                                                                                                               |
| When counseling surrogates of comatose survivors of cardiac arrest, we <b>suggest</b> the patient's age alone <b>not be considered a reliable predictor</b> of mortality assessed at discharge or later. (weak recommendation; very low quality evidence)                                                                                                                                                                     |
| When counseling family members and/ or surrogates of comatose survivors of cardiac arrest, we <b>suggest</b> the initial cardiac rhythm alone <b>not be considered a reliable predictor</b> of mortality assessed at discharge or later. (weak recommendation; very low quality evidence)                                                                                                                                     |
| When counseling family members and/ or surrogates of comatose survivors of cardiac arrest, we <b>suggest</b> the time to return of spontaneous circulation (ROSC) alone <b>not be considered a reliable predictor</b> of mortality assessed at discharge or later. (weak recommendation; very low quality evidence)                                                                                                           |
| Neurological examination                                                                                                                                                                                                                                                                                                                                                                                                      |
| When counseling family members and/ or surrogates of comatose survivors of cardiac arrest, we <b>suggest</b> the bilateral absence of a pupillary light response, assessed at least 72 hours from ROSC, <b>not be considered a reliable predictor</b> of mortality assessed at discharge or later. (weak recommendation; very low quality evidence)                                                                           |
| When counseling family members and/ or surrogates of comatose survivors of cardiac arrest, we <b>suggest</b> the bilateral absence of the corneal reflex alone, assessed at least 72 hours from ROSC, <b>not be considered a reliable predictor</b> of mortality assessed at discharge or later. (weak recommendation; very low quality evidence)                                                                             |
| When counseling family members and/ or surrogates of comatose survivors of cardiac arrest, we <b>suggest</b> that an absent or extensor best-motor response alone, assessed at least 72 hours from ROSC (or 72 hours from rewarming, in patients treated with therapeutic hypothermia) <b>not be considered a reliable predictor</b> of mortality assessed at discharge or later. (weak recommendation; low quality evidence) |
| Myoclonus <48 hours from return of spontaneous circulation, in the absence of concomitant EEG evaluation- There is insufficient evidence for a recommendation                                                                                                                                                                                                                                                                 |
| Brain imaging                                                                                                                                                                                                                                                                                                                                                                                                                 |
| Diffuse pattern of loss of grey-white differentiation with sulcal effacement on non-contrast computed tomography (CT) imaging of the brain performed at least 48 hours from return of spontaneous circulation- There is insufficient evidence for a recommendation                                                                                                                                                            |
| Diffuse pattern of restricted diffusion across vascular distributions in the bilateral cerebral cortex and deep grey matter on magnetic resonance imaging (MRI) of the brain performed between 2-7 days from ROSC - There is insufficient evidence for a recommendation                                                                                                                                                       |
| Electrodiagnostic                                                                                                                                                                                                                                                                                                                                                                                                             |
| Suppressed or burst suppression background, with or without periodic discharges, on EEG performed at least 72 hours from ROSC (or 72 hours from rewarming, in patients treated with therapeutic hypothermia)- There is insufficient evidence for a recommendation                                                                                                                                                             |
| Bilateral absence of the N20 wave, with preservation of responses at Erb's point and the cervical spine, on somatosensory evoked potential (SSEP) testing performed at least 48 hours from return of spontaneous circulation- There is insufficient evidence for a recommendation                                                                                                                                             |
| Biomarkers                                                                                                                                                                                                                                                                                                                                                                                                                    |
| When counseling surrogates of comatose survivors of cardiac arrest, we <b>suggest</b> that the serum level of Neuron Specific Enolase (NSE) alone, measured $\leq 72$ hours from return of spontaneous circulation,                                                                                                                                                                                                           |

|                                                                                                                                                                                                                                                                                                                             |
|-----------------------------------------------------------------------------------------------------------------------------------------------------------------------------------------------------------------------------------------------------------------------------------------------------------------------------|
| <b>not be considered a reliable predictor</b> of mortality assessed at discharge or later. ( <i>weak recommendation; very low quality evidence</i> )                                                                                                                                                                        |
|                                                                                                                                                                                                                                                                                                                             |
| <b>Prediction models</b>                                                                                                                                                                                                                                                                                                    |
| When counseling surrogates of comatose survivors of cardiac arrest, we <b>suggest</b> that the Out of Hospital Cardiac Arrest (OHCA) prediction model <b>not be considered a reliable predictor</b> of mortality assessed at discharge or later. ( <i>weak recommendation; moderate quality evidence</i> )                  |
| When counseling surrogates of comatose survivors of cardiac arrest, we <b>suggest</b> that the Cardiac Arrest Hospital Prognosis (CAHP) prediction model <b>not be considered a reliable predictor</b> of mortality assessed at discharge or later. ( <i>weak recommendation; moderate quality evidence</i> )               |
| When counseling surrogates of comatose survivors of cardiac arrest, we <b>suggest</b> that the Good Outcome Following Attempted Resuscitation (GOFAR) prediction model <b>not be considered a reliable predictor</b> of mortality assessed at discharge or later. ( <i>weak recommendation; moderate quality evidence</i> ) |

**Recommendation table: Individual prognostic indicators of mortality at discharge or later**

| <b>PREDICTOR</b>                                                                                                                | <b>TIME OF ASSESSMENT</b>                | <b>RELIABILITY</b>    |
|---------------------------------------------------------------------------------------------------------------------------------|------------------------------------------|-----------------------|
| Age                                                                                                                             | On admission                             | Not reliable          |
| Initial cardiac rhythm- Nonshockable                                                                                            | On admission                             | Not reliable          |
| Time to return of spontaneous circulation (ROSC)                                                                                | On admission                             | Not reliable          |
| Bilateral absence of the pupillary light response                                                                               | At least 72 hours from ROSC              | Not reliable          |
| Bilateral absence of the corneal reflex                                                                                         | At least 72 hours from ROSC              | Not reliable          |
| Best motor response- extensor or absent                                                                                         | At least 72 hours from ROSC or rewarming | Not reliable          |
| Myoclonus (clinical only, no EEG)                                                                                               | Within 48 hours of ROSC                  | Insufficient evidence |
| CT Diffuse loss of grey-white differentiation with sulcal effacement                                                            | At least 72 hours from ROSC              | Insufficient evidence |
| MRI Diffuse pattern of restricted diffusion across vascular distributions in the bilateral cerebral cortex and deep grey matter | 2-7 days from ROSC                       | Insufficient evidence |
| EEG- suppression or burst suppression with or without periodic discharges                                                       | At least 72 hours from ROSC or rewarming | Insufficient evidence |
| SSEP- bilateral absence of N20 waves                                                                                            | At least 48 hours from ROSC              | Insufficient evidence |
| Neuron Specific Enolase (NSE)                                                                                                   | Within 72 hours of ROSC                  | Not reliable          |

**Clinical prediction models for mortality at discharge or later**

| <b>CLINICAL PREDICTION MODEL</b>                       | <b>RELIABILITY</b> |
|--------------------------------------------------------|--------------------|
| Good Outcome Following Attempted Resuscitation (GOFAR) | Not reliable       |
| Out of Hospital Cardiac Arrest (OHCA)                  | Not reliable       |
| Cardiac Arrest Hospital Prognosis (CAHP)               | Not reliable       |

### **Supplementary appendix 3: Cerebral Performance Category and modified Rankin scale**

#### **Cerebral Performance Categories (CPC) Scale**

Safar P. Resuscitation after Brain Ischemia, in Grenvik A and Safar P Eds: Brain Failure and Resuscitation, Churchill Livingstone, New York, 1981; 155-184.

Note: If patient is anesthetized, paralyzed, or intubated, use “as is” clinical condition to calculate scores.

CPC 1- Good cerebral performance: conscious, alert, able to work, might have mild neurologic or psychologic deficit.

CPC 2- Moderate cerebral disability: conscious, sufficient cerebral function for independent activities of daily life. Able to work in sheltered environment.

CPC 3- Severe cerebral disability: conscious, dependent on others for daily support because of impaired brain function. Ranges from ambulatory state to severe dementia or paralysis.

CPC 4- Coma or vegetative state: any degree of coma without the presence of all brain death criteria. Unawareness, even if appears awake (vegetative state) without interaction with environment; may have spontaneous eye opening and sleep/awake cycles. Cerebral unresponsiveness.

CPC 5- Brain death: apnea, areflexia, EEG silence, etc.

### **Modified Rankin Scale**

Van Swieten, J C; Koudstaal, P J; Visser, M C; Schouten, H J; van Gijn, J (May 1988). "Interobserver agreement for the assessment of handicap in stroke patients". Stroke. 19 (5): 604–607.

0- The patient has no residual symptoms.

1- The patient has no significant disability; able to carry out all pre-stroke activities.

2- The patient has slight disability; unable to carry out all pre-stroke activities but able to look after self without daily help.

3 - The patient has moderate disability; requiring some external help but able to walk without the assistance of another individual.

4 - The patient has moderately severe disability; unable to walk or attend to bodily functions without assistance of another individual.

5- The patient has severe disability; bedridden, incontinent, requires continuous care.

6- The patient has expired (during the hospital stay or after discharge from the hospital).



## **Supplementary Appendix 4**

### **Librarian search string**

Database: All Ovid Medline <1946 - present>

Search Strategy:

- 
- 1 exp Heart Arrest/ (44223)
  - 2 (arrest\* adj3 cardiac).ti,ab. (30880)
  - 3 (arrest\* adj3 cardiopulmonary).ti,ab. (3048)
  - 4 (arrest\* adj3 heart).ti,ab. (1702)
  - 5 asystole\*.ti,ab. (3513)
  - 6 cardiorespiratory arrest\*.ti,ab. (923)
  - 7 circulatory arrest.ti,ab. (5385)
  - 8 anoxic encephalopath\*.ti,ab. (304)
  - 9 ischemic encephalopath\*.ti,ab. (2659)
  - 10 exp Hypoxia, Brain/ and \*Coma/ (224)
  - 11 ((anoxic or hypoxic) adj3 coma).ti,ab. (183)
  - 12 1 or 2 or 3 or 4 or 5 or 6 or 7 or 8 or 9 or 10 or 11 (68845)
  - 13 Disease Progression/ (145228)
  - 14 exp "OUTCOME ASSESSMENT (HEALTH CARE)"/ (977947)
  - 15 outcome\*.ti,ab,kf. [title, abstract, author supplied keyword] (1498262)
  - 16 "Predictive Value of Tests"/ (187455)
  - 17 exp PROGNOSIS/ (1478486)
  - 18 prognostic.tw. (257337)
  - 19 or/13-18 (2823645)
  - 20 12 and 19 (21786)

21 incidence.sh. or exp mortality/ or follow-up studies.sh. or prognos:.tw. or predict:.tw. or course:.tw. [validated hedge for prognosis from the HIRU at McMaster University] (3162483)

22 12 and 21 (20118)

23 20 or 22 (30497)

24 "Analysis of Variance"/ [includes Multivariate Analysis] (212630)

25 outcome variable.mp. (6338)

26 Multivariate.tw. (292572)

27 variable\*.ti,ab. (724641)

28 variance\*.ti,ab. (169055)

29 Data Interpretation, Statistical/ (54504)

30 statistic\*.tw. (971228)

31 sn.fs. [statistics and numerical data as a floating subheading] (722114)

32 Data Interpretation, Statistical/ (54504)

33 24 or 25 or 26 or 27 or 28 or 29 or 30 or 31 or 32 (2666481)

34 23 and 33 (7439)

35 exp cohort studies/ [includes: follow-up studies/, longitudinal studies/, prospective studies/, retrospective studies/, controlled before-after studies/, cross-sectional studies/, or historically controlled study/] (1816568)

36 (Follow-up or longitudinal or prospective or retrospective or before-after or cross-sectional or controlled).tw. (2586857)

37 (comparative study or evaluation study or meta analysis).pt. (1907158)

38 35 or 36 or 37 (4827690)

39 34 and 38 (5348)

40 \*PEDIATRICS/ (35995)

41 animals/ not (humans/ and animals/) (4506319)

42 40 or 41 (4542275)

43 39 not 42 (5206)

44 limit 43 to english language (4970)

45 remove duplicates from 44 (4962)

## Supplementary Appendix 5: Individual studies

## Age as a predictor of functional outcome

| FIRST AUTHOR<br>LAST NAME | PMID     | PROGNOSTIC<br>FACTOR(S)<br>EVALUATED | Prevalence %<br>of the<br>predictor | OUTCOME(S)                           | Sample size<br>for the<br>outcome | Prevalence %<br>of the<br>outcome | EFFECT SIZE WITH<br>95% CI as reported<br>in the study (False<br>Positive Rate,<br>Sensitivity,<br>Specificity, Odds<br>Ratio, Relative<br>Risk) | OVERALL RISK<br>OF BIAS FOR<br>THE STUDY | Overall risk of bias:<br>Comments                                                                                               |
|---------------------------|----------|--------------------------------------|-------------------------------------|--------------------------------------|-----------------------------------|-----------------------------------|--------------------------------------------------------------------------------------------------------------------------------------------------|------------------------------------------|---------------------------------------------------------------------------------------------------------------------------------|
| Edgren 1989               | 2655364  | Age >65                              | NA                                  | GOOD<br>functional<br>outcome 1 year | 262                               | 0.17                              | Not significant                                                                                                                                  | High                                     | Study participation<br>high, Study attrition<br>moderate, Study<br>confounding<br>moderate, Self<br>fulfilling prophecy<br>high |
| Wu 2011                   | 21330629 | Age                                  | Continuous                          | mRS>4 at 6<br>months                 | 151                               | 0.91                              | p=0.49 in<br>univariate, not<br>significant in<br>multivariate<br>analysis                                                                       | High                                     | Study participation<br>moderate, Self-<br>fulfilling prophecy<br>high                                                           |
| Hayashida 2014            | 25168063 | Age                                  | continuous                          | CPC 1-2 at 3<br>months               | 495                               | 0.15                              | OR 0.98 (0.95-0.99)                                                                                                                              | Low                                      |                                                                                                                                 |
| Thomsen 2015              | 25619443 | Age                                  | continuous                          | CPC 3-5 at 6<br>months               | 234                               | Not available                     | OR every 5 years of<br>age- 1.21 (1.05-<br>1.4), p<0.01                                                                                          | High                                     | Self-fulfilling prophecy<br>high                                                                                                |
| Kragholm 2015             | 25941005 | Age 1-49 vs 50-<br>65 years          |                                     | return to work                       | 796 survivors<br>to day 30        | 0.77 of<br>survivors at<br>day 30 | HR 1.31 (1.02-1.68)                                                                                                                              | High                                     | Study confounding<br>high, Self-fulfilling<br>prophecy high                                                                     |
| Stammet 2015              | 25975474 | Age                                  | continuous                          | CPC 3-5 at 6<br>months               | 686                               | 0.49                              | OR 1.098 (1.073-<br>1.124)                                                                                                                       | Moderate                                 | Study participation<br>moderate, Self-<br>fulfilling prophecy<br>moderate. TTM trial<br>substudy.                               |
| Hifumi 2015               | 26212234 | Age >65                              | 0.38                                | CPC 1-2 at 90<br>days                | 302                               | 0.57                              | OR 0.30 (0.17-<br>0.53), p<0.01                                                                                                                  | Low                                      |                                                                                                                                 |

## Supplementary Appendix 5: Individual studies

## Age as a predictor of functional outcome

|                 |          |     |            |                      |      |               |                                       |          |                                                                                      |
|-----------------|----------|-----|------------|----------------------|------|---------------|---------------------------------------|----------|--------------------------------------------------------------------------------------|
| Thomsen 2016    | 26468897 | Age | continuous | CPC 3-5 at 6 months  | 447  | Not available | OR 1.06 (1.04-1.08), p<0.0001         | Moderate | Study participation moderate, Self-fulfilling prophecy moderate. TTM trial substudy. |
| Devaux 2016     | 27438111 | Age | continuous | CPC 3-5 at 6 months  | 579  | 0.48          | OR 2.90 (2.14-3.94)                   | Moderate | Study participation moderate, Self-fulfilling prophecy moderate. TTM trial substudy. |
| Grand 2016      | 27553102 | Age | continuous | CPC 3-5 at 6 months  | 602  | Not available | OR 1.38 (1.24-1.52), p<0.0001         | Moderate | Study participation moderate, Self-fulfilling prophecy moderate. TTM trial substudy. |
| Frydland 2016   | 27614855 | Age | continuous | CPC 3-5 at 6 months  | 647  | Not available | OR 1.06 (1.04-1.08), p<0.0001         | Moderate | Study participation moderate, Self-fulfilling prophecy moderate. TTM trial substudy. |
| Frydland 2016   | 27614855 | Age | continuous | mRS 4-6 at 6 months  | 647  | Not available | OR 1.06 (1.04-1.08), p<0.0001         | Moderate | Study participation moderate, Self-fulfilling prophecy moderate. TTM trial substudy. |
| Lee 2018        | 29763714 | Age | continuous | CPC 3-5 at 6 months  | 329  | 0.70          | OR 1.06 (1.03-1.092)                  | Low      |                                                                                      |
| Ebner 2019      | 30691510 | Age | continuous | CPC 3-5 at 6 months  | 869  | 0.49          | OR 1.07 (1.05-1.09), p<0.001          | Moderate | Study participation moderate, Self-fulfilling prophecy moderate. TTM trial substudy. |
| Pekkarinen 2019 | 30819234 | Age | Continuous | CPC 3-5 at 12 months | 1324 | 0.55          | OR 1.03 (95%CI 1.02 - 1.04), p<0.01   | High     | Self fulfilling prophecy high                                                        |
| Han 2019        | 30934011 | Age | Continuous | CPC 1-2 at 3 months  | 335  | 0.14          | OR 0.988 (95%CI 0.970–1.006), p=0.186 | High     | Outcome measurement high                                                             |

**Supplementary Appendix 5: Individual studies****Age as a predictor of functional outcome**

|              |          |     |            |                     |     |      |                                                 |      |                                                             |
|--------------|----------|-----|------------|---------------------|-----|------|-------------------------------------------------|------|-------------------------------------------------------------|
| Hong 2019    | 30953628 | Age | Continuous | CPC 3-5 at 6 months | 512 | 0.68 | OR 1.058 (95%CI 1.027 1.089), $p < 0.001$       | Low  |                                                             |
| Ruijter 2019 | 31155751 | Age | Continuous | CPC 3-5 at 6 months | 850 | 0.54 | Beta coefficient 0.039 (SE 0.010), $p < 0.001$  | High | Study participation moderate, Self-fulfilling prophecy high |
| Ruijter 2019 | 31155751 | Age | Continuous | CPC 1-2 at 6 months | 850 | 0.46 | Beta coefficient -0.028 (SE 0.009), $p = 0.003$ | High | Study participation moderate, Self-fulfilling prophecy high |
| Oh 2019      | 31521016 | Age | Continuous | mRS < 4 at 6 months | 583 | 0.35 | OR .98 (95%CI 0.96-1.00), $p = 0.1$             | Low  |                                                             |
| Nakstad 2020 | 31926258 | Age | Continuous | CPC 3-5 at 6 months | 259 | 0.51 | $p = 0.095$                                     | High | Study confounding moderate, Self-fulfilling prophecy high   |
| Deye 2020    | 32858156 | Age | Continuous | CPC 3-5 at 3 months | 330 | 0.67 | $p = 0.0002$ in univariate analysis             | High | Self fulfilling prophecy high                               |

## Age as a predictor of mortality

| FIRST AUTHOR LAST NAME | PMID     | PROGNOSTIC FACTOR(S) EVALUATED | Prevalence % of the predictor | OUTCOME(S)                       | Sample size for the outcome | Prevalence % of the outcome | EFFECT SIZE WITH 95% CI as reported in the study (False Positive Rate, Sensitivity, Specificity, Odds Ratio, Relative Risk) | OVERALL RISK OF BIAS FOR THE STUDY | Overall risk of bias: Comments                                                                                |
|------------------------|----------|--------------------------------|-------------------------------|----------------------------------|-----------------------------|-----------------------------|-----------------------------------------------------------------------------------------------------------------------------|------------------------------------|---------------------------------------------------------------------------------------------------------------|
| Edgren 1989            | 2655364  | Age >65                        | NA                            | Mortality 1 year                 | 262                         | 0.79                        | p=0.009                                                                                                                     | High                               | Study participation high, Study attrition moderate, Study confounding moderate, Self fulfilling prophecy high |
| Grubb 1995             | 7623574  | Age                            | Continuous                    | Mortality in-hospital, all-cause | 270                         | 0.51                        | NS                                                                                                                          | High                               | Self fulfilling prophecy high                                                                                 |
| Arrich 2006            | 16974213 | age                            | continuous                    | in-hospital mortality            | 774                         | 0.56                        | OR 1.05 (1.04-1.07)                                                                                                         | High                               | Self fulfilling prophecy high                                                                                 |
| Chan 2013              | 23484828 | Age 75-84 compared to 65-74    | Continuous                    | Survival 1 year                  | 6972                        | 0.42                        | OR 0.92 (95% CI 0.88 to 0.96), p<0.001                                                                                      | High                               | Study participation High, Self-fulfilling prophecy High                                                       |

## Age as a predictor of mortality

|                   |          |                                   |            |                                  |      |               |                                        |          |                                                                                      |
|-------------------|----------|-----------------------------------|------------|----------------------------------|------|---------------|----------------------------------------|----------|--------------------------------------------------------------------------------------|
| Chan 2013         | 23484828 | Age >85 compared to 65-74         | Continuous | Survival 1 year                  | 6972 | 0.42          | OR 0.78 (95% CI 0.73 to 0.84), p<0.001 | High     | Study participation High, Self-fulfilling prophecy High                              |
| Roberts 2013      | 23507719 | Age                               | Continuous | Mortality in-hospital, all-cause | 203  | 0.67          | OR 1.29 (95% CI 1.02 to 1.62)          | High     | Self-fulfilling prophecy high                                                        |
| Bro-Jeppesen 2013 | 23917079 | age                               | continuous | Mortality at 30 days             | 270  | 0.29          | OR 1.20 (1.1-1.4)                      | High     | Study participation moderate, Self-fulfilling prophecy high                          |
| Thomsen 2015      | 25619443 | age                               | continuous | mortality 6 mo                   | 234  | 0.28          | OR 1.19 (1.05-1.36)                    | High     | Self-fulfilling prophecy high                                                        |
| Thomsen 2016      | 26468897 | age (both)                        | continuous | mortality 6 months               | 447  | 0.47          | OR 1.04 (1.03-1.06)                    | Moderate | Study participation moderate, Self-fulfilling prophecy moderate. TTM trial substudy. |
| Devaux 2016       | 27438111 | Age (both poor outcome and death) | continuous | mortality 6 months               | 579  | Not available | OR 1.75 (1.49-2.05)                    | Moderate | Study participation moderate, Self-fulfilling prophecy moderate. TTM trial substudy. |

## Age as a predictor of mortality

|                   |          |                  |            |                                  |     |               |                                                                     |          |                                                                                       |
|-------------------|----------|------------------|------------|----------------------------------|-----|---------------|---------------------------------------------------------------------|----------|---------------------------------------------------------------------------------------|
| Grand 2016        | 27553102 | age              | continuous | mortality 6 months               | 602 | Not available | OR 1.25 (1.17-1.33)                                                 | Moderate | Study participation moderate, Self-fulfilling prophecy moderate. TTM trial substudy.  |
| Wada 2016         | 27679536 | Age              | Continuous | Mortality in-hospital, all-cause | 388 | 0.40          | Not statistically significant                                       | High     | Self-fulfilling prophecy high                                                         |
| Russo 2018        | 28045336 | Age              | continuous | hospital death                   | 122 | 0.24          | OR 1.07 (1.02-1.11)                                                 | High     | Self-fulfilling prophecy high                                                         |
| Lee 2017          | 28392372 | Age              | continuous | 6 month mortality                | 534 | 0.60          | OR 1.05 (1.03-1.07)                                                 | Low      |                                                                                       |
| Nayeri 2017       | 28589506 | Age              | Continuous | Mortality 1 year                 | 314 | 0.62          | OR 1.03 (95% CI 1.01 to 1.05), p=0.014                              | High     | Self-fulfilling prophecy high                                                         |
| Salam 2018        | 29553891 | Age in shockable | continuous | 30 day mortality                 | 324 | 0.62          | OR 1.26 (1.16-1.36)                                                 | High     | Self-fulfilling prophecy high                                                         |
| Limpawattana 2018 | 29593417 | Age              | Continuous | Mortality 1 year                 | 202 | 0.92          | Hazard ratio 0.99 (95%CI 0.98-1.00), p=0.370 in univariate analysis | Moderate | Self fulfilling prophecy moderate                                                     |
| Sinkovic 2018     | 29854815 | Age              | Continuous | Mortality 6 month                | 119 | 0.48          | Adjusted OR per 10 years of age 1.56 (95%CI 0.92 to 2.63), p=0.097  | High     | Study participation moderate, Study attrition moderate, Self-fulfilling prophecy high |



## Age as a predictor of mortality

|                 |          |         |            |                                  |      |      |                                                                           |          |                                                          |
|-----------------|----------|---------|------------|----------------------------------|------|------|---------------------------------------------------------------------------|----------|----------------------------------------------------------|
| Smith 2019      | 30411470 | Age ≥50 | 0.83       | Mortality in-hospital, all-cause | 388  | 0.62 | OR 2.23, p=0.04                                                           | High     | Self fulfilling prophecy high                            |
| Patel 2019      | 30815378 | Age     | Continuous | Mortality in-hospital, all-cause | 153  | 0.65 | OR 1.03 (95%CI 1.0-1.07), p=0.05                                          | High     | Statistical analysis high, Self fulfilling prophecy High |
| Pekkarinen 2019 | 30819234 | Age     | Continuous | Mortality 1 year                 | 1324 | 0.48 | OR 1.03 (95%CI 1.02 - 1.04), p<0.01                                       | High     | Self fulfilling prophecy high                            |
| McLaughlin 2019 | 31103131 | Age     | Continuous | Mortality in-hospital, all-cause | 1433 | 0.47 | Hazard ratio 1.03 (95% CI 1.03-1.04), p<0.001                             | High     | Self fulfilling prophecy high                            |
| Kong 2020       | 31306348 | Age     | Continuous | Survival in-hospital, all-cause  | 524  | 0.70 | OR 0.968 (95%CI 0.946–0.989), p=0.004                                     | Moderate | Self fulfilling prophecy moderate                        |
| Cocchi 2020     | 31466497 | Age     | Continuous | Mortality in-hospital, all-cause | 249  | 0.61 | Odds ratio (per year increase) 1.02 (95% CI 1.00-1.04), p=0.18            | High     | Self fulfilling prophecy high                            |
| Oh 2019         | 31521016 | Age     | Continuous | Survival 6 months                | 583  | 0.45 | NS in multivariate analysis                                               | Moderate | Self fulfilling prophecy moderate                        |
| Fisher 2021     | 33021889 | Age     | Continuous | Mortality in-hospital, all-cause | 254  | 0.30 | Cox proportional hazard ratio for death 1.02 (95% CI 1.01–1.03), p=0.0001 | High     | Self fulfilling prophecy high                            |

## Initial cardiac rhythm as a predictor of functional outcome

| FIRST AUTHOR LAST NAME | PMID     | PROGNOSTIC FACTOR(S) EVALUATED                                 | Prevalence % of the predictor | OUTCOME(S)                     | Sample size for the outcome | Prevalence % of the outcome | EFFECT SIZE WITH 95% CI as reported in the study (False Positive Rate, Sensitivity, Specificity, Odds Ratio, Relative Risk) | OVERALL RISK OF BIAS FOR THE STUDY | Overall risk of bias: Comments                                                                                |
|------------------------|----------|----------------------------------------------------------------|-------------------------------|--------------------------------|-----------------------------|-----------------------------|-----------------------------------------------------------------------------------------------------------------------------|------------------------------------|---------------------------------------------------------------------------------------------------------------|
| Edgren 1989            | 2655364  | Cardiac rhythm-Nonshockable                                    | 0.39                          | GOOD functional outcome 1 year | 262                         | 0.17                        | Not statistically significant                                                                                               | High                               | Study participation high, Study attrition moderate, Study confounding moderate, Self fulfilling prophecy high |
| Reisinger 2007         | 17060343 | Non shockable for persistent coma poor outcome at 6 mo (CPC 4) | 0.47                          | CPC 4 at 6 months              | 177                         | 0.33                        | OR 10.10 (2.3-44.24)                                                                                                        | Moderate                           | Study confounding moderate, Self-fulfilling prophecy moderate                                                 |
| Rossetti 2010          | 20373341 | Non-Shockable rhythm                                           | 0.4                           | CPC 3-5 at 3-6 months          | 109                         | 0.77                        | FPR 0.16                                                                                                                    | High                               | Self fulfilling prophecy high                                                                                 |
| Greer 2013             | 23954666 | Non-shockable rhythm                                           | 0.66                          | mRS 4-6 at 6 months            | 200                         | 0.90                        | FPR 0.4 for all non-shockable-FPR 0.3 for PEA and 0.1 for asystole                                                          | High                               | Study confounding moderate, Self-fulfilling prophecy high                                                     |
| Terman 2014            | 25014063 | Non-Shockable rhythm                                           | 0.46                          | CPC 1-2 at 6-12 months         | 123                         | 0.29                        | OR 0.09 (0.09-0.3)                                                                                                          | High                               | Self-fulfilling prophecy high                                                                                 |

## Initial cardiac rhythm as a predictor of functional outcome

|                 |          |                                |               |                      |      |      |                                        |          |                                                                                      |
|-----------------|----------|--------------------------------|---------------|----------------------|------|------|----------------------------------------|----------|--------------------------------------------------------------------------------------|
| Hayashida 2014  | 25168063 | Shockable rhythm               | 0.24          | CPC 1-2 at 3 months  | 495  | 0.15 | OR 2.53 (1.10-5.79)                    | Low      |                                                                                      |
| Devaux 2016     | 27438111 | First rhythm (both)            | 0.79          | CPC 3-5 at 6 months  | 579  | 0.53 | OR 0.36 (0.18-0.76)                    | Moderate | Study participation moderate, Self-fulfilling prophecy moderate. TTM trial substudy. |
| Lee 2018        | 29763714 | ECG rhythm in EMS nonshockable | 0.69          | CPC 3-5 at 6 months  | 329  | 0.70 | OR 13.46 (1.725-105)                   | Low      |                                                                                      |
| Lee 2018        | 29763714 | ECG rhythm in ED nonshockable  | 0.78          | CPC 3-5 at 6 months  | 329  | 0.70 | OR 4.06 (1.077-15.3)                   | Low      |                                                                                      |
| Ebner 2019      | 30691510 | Shockable rhythm               | Not available | CPC 3-5 at 6 months  | 869  | 0.49 | OR 0.19 (0.11–0.34), p<0.001           | Moderate | Study participation moderate, Self-fulfilling prophecy moderate. TTM trial substudy. |
| Pekkarinen 2019 | 30819234 | Cardiac rhythm-Nonshockable    | 0.40          | CPC 3-5 at 12 months | 1324 | 0.55 | OR 3.89 (95%CI 2.82 - 5.37), p<0.01    | High     | Self fulfilling prophecy high                                                        |
| Hong 2019       | 30953628 | Cardiac rhythm-Nonshockable    | 0.56          | CPC 3-5 at 6 months  | 512  | 0.68 | OR 6.767 (95%CI 1.540-29.727), p=0.011 | Low      |                                                                                      |
| Nakstad 2020    | 31926258 | Cardiac rhythm-Nonshockable    | 0.32          | CPC 3-5 at 6 months  | 259  | 0.51 | FPR 0.13 (0.08-0.21)                   | High     | Study confounding moderate, Self fulfilling prophecy high                            |

## Initial cardiac rhythm as a predictor of mortality

| FIRST AUTHOR LAST NAME | PMID     | PROGNOSTIC FACTOR(S) EVALUATED | Prevalence % of the predictor | OUTCOME(S)                       | Sample size for the outcome | Prevalence % of the outcome | EFFECT SIZE WITH 95% CI as reported in the study (False Positive Rate, Sensitivity, Specificity, Odds Ratio, Relative Risk) | OVERALL RISK OF BIAS FOR THE STUDY | Overall risk of bias: Comments                                                                                |
|------------------------|----------|--------------------------------|-------------------------------|----------------------------------|-----------------------------|-----------------------------|-----------------------------------------------------------------------------------------------------------------------------|------------------------------------|---------------------------------------------------------------------------------------------------------------|
| Edgren 1989            | 2655364  | Cardiac rhythm-Nonshockable    | 0.39                          | Mortality 1 year                 | 262                         | 0.79                        | p=0.012                                                                                                                     | High                               | Study participation high, Study attrition moderate, Study confounding moderate, Self fulfilling prophecy high |
| Grubb 1995             | 7623574  | Cardiac rhythm-Nonshockable    | 0.16                          | Mortality in-hospital, all-cause | 197                         | 0.51                        | p<0.001                                                                                                                     | High                               | Self fulfilling prophecy high                                                                                 |
| Rossetti 2010          | 20373341 | Non-Shockable rhythm           | 0.4                           | Mortality in-hospital, all-cause | 111                         | 0.59                        | FPR 0.16                                                                                                                    | High                               | Self fulfilling prophecy high                                                                                 |
| Devaux 2016            | 27438111 | First rhythm (both)            | 0.79                          | mortality 6 months               | 579                         | Not available               | OR 0.5 (0.37-0.68)                                                                                                          | Moderate                           | Study participation moderate, Self-fulfilling prophecy moderate. TTM trial substudy.                          |

## Initial cardiac rhythm as a predictor of mortality

|                    |          |                                 |      |                                          |      |      |                                                      |      |                                                                                                          |
|--------------------|----------|---------------------------------|------|------------------------------------------|------|------|------------------------------------------------------|------|----------------------------------------------------------------------------------------------------------|
| Sinkovic<br>2018   | 29854815 | Cardiac rhythm-<br>Nonshockable | 0.42 | Mortality 6<br>month                     | 119  | 0.48 | Adjusted OR 1.40<br>(95%CI 0.33 to<br>5.88), p=0.647 | High | Study<br>participation<br>moderate, Study<br>attrition<br>moderate, Self-<br>fulfilling prophecy<br>high |
| Pekkarinen<br>2019 | 30819234 | Cardiac rhythm-<br>Nonshockable | 0.40 | Mortality 1 year                         | 1324 | 0.48 | OR 3.65 (95%CI<br>2.61 - 4.82), p<<br>0.01           | High | Self fulfilling<br>prophecy high                                                                         |
| McLaughlin<br>2019 | 31103131 | Cardiac rhythm-<br>Nonshockable | 0.25 | Mortality in-<br>hospital, all-<br>cause | 1433 | 0.47 | Hazard ratio 1.55<br>(95% CI 1.17-<br>2.03), p=0.002 | High | Self fulfilling<br>prophecy high                                                                         |

## Time to return of spontaneous circulation (ROSC) as a predictor of functional outcome

| FIRST AUTHOR LAST NAME | PMID     | PROGNOSTIC FACTOR(S) EVALUATED              | Prevalence % of the predictor | OUTCOME(S)                     | Sample size for the outcome | Prevalence % of the outcome | EFFECT SIZE WITH 95% CI as reported in the study (False Positive Rate, Sensitivity, Specificity, Odds Ratio, Relative Risk) | OVERALL RISK OF BIAS FOR THE STUDY | Overall risk of bias: Comments                                                                                    |
|------------------------|----------|---------------------------------------------|-------------------------------|--------------------------------|-----------------------------|-----------------------------|-----------------------------------------------------------------------------------------------------------------------------|------------------------------------|-------------------------------------------------------------------------------------------------------------------|
| Edgren 1989            | 2655364  | Time to ROSC- Untreated arrest time >5 mins | 0.36                          | GOOD functional outcome 1 year | 262                         | 0.17                        | p<0.001                                                                                                                     | High                               | Study participation high, Study attrition moderate, Study confounding moderate, Self fulfilling prophecy high     |
| Edgren 1989            | 2655364  | Time to ROSC- CPR time >15 mins             | 0.45                          | GOOD functional outcome 1 year | 262                         | 0.17                        | p=0.033                                                                                                                     | High                               | Study participation moderate, Study attrition moderate, Study confounding moderate, Self fulfilling prophecy high |
| Rossetti 2010          | 20373341 | ROSC >25 minutes                            | 0.48                          | CPC 3-5 at 3-6 months          | 109                         | 0.77                        | FPR 0.24                                                                                                                    | High                               | Self fulfilling prophecy high                                                                                     |

## Time to return of spontaneous circulation (ROSC) as a predictor of functional outcome

|                 |          |                      |                    |                      |      |      |                                      |          |                                                                                      |
|-----------------|----------|----------------------|--------------------|----------------------|------|------|--------------------------------------|----------|--------------------------------------------------------------------------------------|
| Laurikkala 2019 | 29608551 | ROSC delay           | Not reported       | CPC 3-5 at 12 months | 458  | 0.60 | NS on multivariate analysis          | Moderate | Study confounding moderate, Self-fulfilling prophecy moderate                        |
| Ebner 2019      | 30691510 | Time to ROSC         | continuous         | CPC 3-5 at 6 months  | 869  | 0.49 | OR 1.03 (1.02-1.04), p<0.001         | Moderate | Study participation moderate, Self-fulfilling prophecy moderate. TTM trial substudy. |
| Pekkarinen 2019 | 30819234 | ROSC delay (min)     | Continuous         | CPC 3-5 at 12 months | 1324 | 0.55 | OR 1.05 (95%CI 1.03 - 1.06), p<0.01  | High     | Self fulfilling prophecy high                                                        |
| Han 2019        | 30934011 | ACLS duration        | Continuous         | CPC 1-2 at 3 months  | 335  | 0.14 | OR 0.965 (95% 0.947–0.984 ), p<0.001 | High     | Outcome measurement high                                                             |
| Oh 2019         | 31521016 | Collapse to ROSC     | Continuous         | mRS<4 at 6 months    | 583  | 0.35 | OR .96 (95%CI 0.94-0.98), p<0.001    | Low      |                                                                                      |
| Nakstad 2020    | 31926258 | Time to ROSC >25 min | Not clearly stated | CPC 3-5 at 6 months  | 259  | 0.51 | FPR 0.32 (0.24-0.42)                 | High     | Study confounding moderate, Self fulfilling prophecy high                            |

## Time to return of spontaneous circulation (ROSC) as a predictor of functional outcome

|           |          |                                       |            |                     |     |      |                                         |      |                               |
|-----------|----------|---------------------------------------|------------|---------------------|-----|------|-----------------------------------------|------|-------------------------------|
| Deye 2020 | 32858156 | No flow time-collapse to onset of CPR | Continuous | CPC 3-5 at 3 months | 330 | 0.67 | OR 0.790 (95% CI 0.707-0.884), p<0.0001 | High | Self fulfilling prophecy high |
|-----------|----------|---------------------------------------|------------|---------------------|-----|------|-----------------------------------------|------|-------------------------------|



## Time to return of spontaneous circulation (ROSC) as a predictor of mortality

| FIRST<br>AUTHOR<br>LAST NAME | PMID     | PROGNOSTIC<br>FACTOR(S)<br>EVALUATED                 | Prevalence<br>% of the<br>predictor | OUTCOME(S)                               | Sample size<br>for the<br>outcome | Prevalence<br>% of the<br>outcome | EFFECT SIZE<br>WITH 95% CI as<br>reported in the<br>study (False<br>Positive Rate,<br>Sensitivity,<br>Specificity,<br>Odds Ratio,<br>Relative Risk) | OVERALL<br>RISK OF BIAS<br>FOR THE<br>STUDY | Overall risk of bias:<br>Comments                                                                                                         |
|------------------------------|----------|------------------------------------------------------|-------------------------------------|------------------------------------------|-----------------------------------|-----------------------------------|-----------------------------------------------------------------------------------------------------------------------------------------------------|---------------------------------------------|-------------------------------------------------------------------------------------------------------------------------------------------|
| Edgren<br>1989               | 2655364  | Time to ROSC-<br>Untreated<br>arrest time >5<br>mins | 0.36                                | Mortality 1<br>year                      | 262                               | 0.79                              | p=0.039                                                                                                                                             | High                                        | Study<br>participation high,<br>Study attrition<br>moderate, Study<br>confounding<br>moderate, Self<br>fulfilling prophecy<br>high        |
| Edgren<br>1989               | 2655364  | Time to ROSC-<br>CPR time >15<br>mins                | 0.45                                | Mortality 1<br>year                      | 262                               | 0.79                              | p=0.021                                                                                                                                             | High                                        | Study<br>participation<br>moderate, Study<br>attrition<br>moderate, Study<br>confounding<br>moderate, Self<br>fulfilling prophecy<br>high |
| Rossetti<br>2010             | 20373341 | ROSC >25<br>minutes                                  | 0.49                                | Mortality in-<br>hospital, all-<br>cause | 111                               | 0.59                              | FPR 0.24                                                                                                                                            | High                                        | Self fulfilling<br>prophecy high                                                                                                          |

## Time to return of spontaneous circulation (ROSC) as a predictor of mortality

|                 |          |                                       |            |                                 |      |      |                                        |          |                                                                       |
|-----------------|----------|---------------------------------------|------------|---------------------------------|------|------|----------------------------------------|----------|-----------------------------------------------------------------------|
| Lee 2017        | 28392372 | Time to ROSC                          | continuous | 6 month mortality               | 534  | 0.60 | OR 1.03 (1.01-1.04)                    | Moderate | Self-fulfilling prophecy moderate                                     |
| Nayeri 2017     | 28589506 | Time to ROSC (min)                    | Continuous | Mortality 1 year                | 306  | 0.62 | OR 1.06 (95% CI 1.03 to 1.08), p<0.001 | High     | Self-fulfilling prophecy high                                         |
| Salam 2018      | 29553891 | Time to ROSC with shockable rhythm    | continuous | 30 day mortality                | 324  | 0.28 | OR 1.10 (1.03-1.18), p<0.01            | High     | Prognostic factor measurement moderate, Self-fulfilling prophecy high |
| Salam 2018      | 29553891 | Time to ROSC with nonshockable rhythm | continuous | 30 day mortality                | 324  | 0.62 | OR 1.07 (0.98-1.18), p=0.11            | High     | Prognostic factor measurement moderate, Self-fulfilling prophecy high |
| Pekkarinen 2019 | 30819234 | Time to ROSC (min)                    | Continuous | Mortality 1 year                | 1324 | 0.48 | OR 1.05 (95%CI 1.03 - 1.06), p<0.01    | High     | Self fulfilling prophecy high                                         |
| Kong 2020       | 31306348 | Arrest to ROSC time                   | Continuous | Survival in-hospital, all-cause | 524  | 0.70 | OR 0.934 (95%CI 0.913–0.957), p<0.001  | Moderate | Self-fulfilling prophecy moderate                                     |
| Oh 2019         | 31521016 | Collapse to ROSC                      | Continuous | Survival 6 months               | 583  | 0.45 | OR .96 (95%CI 0.95-0.98), p<0.001      | Moderate | Self-fulfilling prophecy moderate                                     |

## Pupillary light response and Corneal reflex as predictors of functional outcome

| FIRST<br>AUTHOR<br>LAST NAME | PMID     | Category of<br>Predictor                               | Timing of<br>prognostic<br>factor<br>evaluation | Prevalence<br>% of the<br>predictor | OUTCOME(S)             | Sample size<br>for the<br>outcome | Prevalence<br>% of the<br>outcome | EFFECT SIZE<br>WITH 95% CI<br>as reported in<br>the study<br>(False Positive<br>Rate,<br>Sensitivity,<br>Specificity,<br>Odds Ratio,<br>Relative Risk) | OVERALL<br>RISK OF BIAS<br>FOR THE<br>STUDY | Overall risk of<br>bias:<br>Comments                                                                                                            |
|------------------------------|----------|--------------------------------------------------------|-------------------------------------------------|-------------------------------------|------------------------|-----------------------------------|-----------------------------------|--------------------------------------------------------------------------------------------------------------------------------------------------------|---------------------------------------------|-------------------------------------------------------------------------------------------------------------------------------------------------|
| Lee 2018                     | 29763714 | Pupillary<br>reflex<br>absent,<br>bilateral            | within 2 h of<br>ROSC                           | 0.80                                | CPC 3-5 at 6<br>months | 329                               | 0.70                              | FPR 0.15                                                                                                                                               | High                                        | Prognostic<br>factor<br>measurement<br>high                                                                                                     |
| Dragancea<br>2015            | 25921544 | Pupillary<br>light<br>response<br>absent,<br>bilateral | Median 117<br>(93-137)<br>hours                 | 0.21                                | CPC 3-5 at 6<br>months | 308                               | 0.85                              | FPR 2.1% (0.3-<br>11),<br>Sensitivity<br>24.1%<br>(19.3–29.7)                                                                                          | Moderate                                    | Study<br>participation<br>moderate,<br>Study<br>confounding<br>moderate. Self-<br>fulfilling<br>prophecy<br>moderate.<br>TTM trial<br>substudy. |

## Pupillary light response and Corneal reflex as predictors of functional outcome

|             |          |                                            |                        |                        |                                                                                               |     |      |                                                                       |      |                                                                                          |
|-------------|----------|--------------------------------------------|------------------------|------------------------|-----------------------------------------------------------------------------------------------|-----|------|-----------------------------------------------------------------------|------|------------------------------------------------------------------------------------------|
| Edgren 1994 | 7909098  | Pupillary light response absent, bilateral | 72h from ROSC          | 0.07                   | CPC 3-5 at 6-12 months                                                                        | 262 | 0.54 | FPR 0                                                                 | High | Study confounding moderate, Statistical analysis moderate, Self fulfilling prophecy high |
| Greer 2013  | 23954666 | Pupillary light response absent, bilateral | Day 3, Day 7           | Day 3-0.19, Day 7-0.12 | mRS 4-6 at 6 months                                                                           | 200 | 0.90 | FPR 0 at both time points. Sensitivity 24% at day 3 and 18% at day 7. | High | Study confounding moderate, Self-fulfilling prophecy high                                |
| Hong 2019   | 30953628 | Pupillary light response absent, bilateral | Within 2 hours of ROSC | 0.52                   | CPC 3-5 at 6 months                                                                           | 512 | 0.68 | OR 3.789, (95%CI 1.480-9.698), p=0.005                                | High | Prognostic factor measurement high                                                       |
| Levy 1985   | 3968772  | Pupillary light response absent, bilateral | Initial examination    | 0.25                   | Poor functional outcome at 1 year- Severe disability (dependence for some functions) or worse | 210 | 0.88 | FPR 0 (0-0.07)                                                        | High | Study confounding moderate, Self fulfilling prophecy high                                |

## Pupillary light response and Corneal reflex as predictors of functional outcome

|                    |          |                                            |                |      |                     |     |      |                                                     |          |                                                                                                                  |
|--------------------|----------|--------------------------------------------|----------------|------|---------------------|-----|------|-----------------------------------------------------|----------|------------------------------------------------------------------------------------------------------------------|
| Moseby-Knappe 2018 | 30383090 | Pupillary light response absent, bilateral | Median 119 hrs | 0.21 | CPC 3-5 at 6 months | 245 | 0.86 | Sensitivity 24%, Specificity 97%                    | Moderate | Study participation moderate, Study confounding moderate, Self-fulfilling prophecy moderate. TTM trial substudy. |
| Nakstad 2020       | 31926258 | Pupillary light response absent, bilateral | >72h           | 0.06 | CPC 3-5 at 6 months | 185 | 0.51 | FPR 0                                               | High     | Study confounding moderate, Self-fulfilling prophecy high                                                        |
| Oh 2020            | 32169609 | Pupillary light response absent, bilateral | 72-96 hours    | 0.44 | CPC 3-5 at 6 months | 259 | 0.70 | Sensitivity 62.2% (54.6-69.3), FPR 0.05 (0.01-0.12) | Moderate | Study confounding moderate                                                                                       |
| Scarpino 2021      | 33819501 | Pupillary light response absent, bilateral | 72h from ROSC  | 0.28 | CPC 3-5 at 6 months | 403 | 0.66 | FPR 0.04 (0.01-0.11), sensitivity 66% (58-73)       | Moderate | Study participation moderate, Study confounding moderate                                                         |

## Pupillary light response and Corneal reflex as predictors of functional outcome

|               |          |                                                                        |                       |      |                       |     |      |                                                                                          |      |                                                                                             |
|---------------|----------|------------------------------------------------------------------------|-----------------------|------|-----------------------|-----|------|------------------------------------------------------------------------------------------|------|---------------------------------------------------------------------------------------------|
| Velly 2018    | 29500154 | Pupillary light response absent, bilateral                             | On admission          | 0.18 | CPC 3-5 at 6 months   | 150 | 0.78 | FPR 0.18                                                                                 | High | Study participation high, Prognostic factor measurement high, Self-fulfilling prophecy high |
| Wu 2011       | 21330629 | Pupillary light response absent, bilateral                             | 72h from ROSC         | 0.19 | mRS>4 at 6 months     | 151 | 0.91 | Sensitivity 24% (16–34), Specificity 100% (73–100), significant in multivariate analysis | High | Study participation moderate, Self-fulfilling prophecy high                                 |
| Rossetti 2010 | 20373341 | Either pupillary, corneal or oculocephalic reflexes absent bilaterally | 36-72 hours from ROSC | 0.43 | CPC 3-5 at 3-6 months | 109 | 0.77 | FPR 0.08                                                                                 | High | Self fulfilling prophecy high                                                               |

## Pupillary light response and Corneal reflex as predictors of functional outcome

|                |          |                                  |                           |                          |                       |     |      |                                                                       |          |                                                                                                                  |
|----------------|----------|----------------------------------|---------------------------|--------------------------|-----------------------|-----|------|-----------------------------------------------------------------------|----------|------------------------------------------------------------------------------------------------------------------|
| Dragancea 2015 | 25921544 | Corneal reflex absent, bilateral | Median 117 (93-137) hours | 0.3                      | CPC 3-5 at 3-6 months | 301 | 0.85 | FPR 2.2% (0.3-11), Sensitivity 35% (29-41)                            | Moderate | Study participation moderate, Study confounding moderate, Self-fulfilling prophecy moderate. TTM trial substudy. |
| Greer 2013     | 23954666 | Corneal reflex absent, bilateral | Day 3, Day 7              | Day 3- 0.39, Day 7- 0.15 | mRS 4-6 at 6 months   | 200 | 0.70 | FPR 0 at both time points. Sensitivity 49% at day 3 and 23% at day 7. | High     | Study confounding moderate, Self-fulfilling prophecy high                                                        |
| Hong 2019      | 30953628 | Corneal reflex absent, bilateral | Within 2 hours of ROSC    | 0.64                     | CPC 3-5 at 6 months   | 512 | 0.68 | OR 6.643 (95%CI 2.445-18.049), p=0.005                                | High     | Prognostic factor measurement high                                                                               |
| Lee 2018       | 29763714 | Corneal reflex absent, bilateral | within 2 h of ROSC        | 0.80                     | CPC 3-5 at 6 months   | 329 | 0.70 | FPR 0.26, OR 5.63 (2.08 - 15.20), p=0.001                             | High     | Prognostic factor measurement high                                                                               |

## Pupillary light response and Corneal reflex as predictors of functional outcome

|                    |          |                                  |                |      |                     |     |      |                                                                                          |          |                                                                                                                  |
|--------------------|----------|----------------------------------|----------------|------|---------------------|-----|------|------------------------------------------------------------------------------------------|----------|------------------------------------------------------------------------------------------------------------------|
| Moseby-Knappe 2018 | 30383090 | Corneal reflex absent, bilateral | Median 119 hrs | 0.32 | CPC 3-5 at 6 months | 245 | 0.86 | Sensitivity 37%, Specificity 97%                                                         | Moderate | Study participation moderate, Study confounding moderate, Self-fulfilling prophecy moderate. TTM trial substudy. |
| Oh 2020            | 32169609 | Corneal reflex absent, bilateral | 72-96 hours    | 0.63 | CPC 3-5 at 6 months | 221 | 0.74 | Sensitivity 84.9% (78.2-90.2), FPR 0.16 (0.08-                                           | Moderate | Study confounding moderate                                                                                       |
| Velly 2018         | 29500154 | Corneal reflex absent, bilateral | On admission   | 0.18 | CPC 3-5 at 6 months | 150 | 0.78 | FPR 0.09                                                                                 | High     | Study participation high, Prognostic factor measurement high, Self-fulfilling prophecy high                      |
| Wu 2011            | 21330629 | Corneal reflex absent, bilateral | 72h from ROSC  | 0.43 | mRS>4 at 6 months   | 151 | 0.91 | Sensitivity 50% (39-61), Specificity 100% (73-100), significant in multivariate analysis | High     | Study participation moderate, Self-fulfilling prophecy high                                                      |



## Pupillary light response and Corneal reflex as predictors of mortality

| FIRST AUTHOR LAST NAME | PMID     | PROGNOSTIC FACTOR(S) EVALUATED                                         | Category of Predictor | Timing of prognostic factor evaluation | Prevalence % of the predictor | OUTCOME(S)                       | Sample size for the outcome | Prevalence % of the outcome | EFFECT SIZE WITH 95% CI as reported in the study (False Positive Rate, Sensitivity, Specificity, Odds Ratio, Relative Risk) | OVERALL RISK OF BIAS FOR THE STUDY | Overall risk of bias: Comments                              |
|------------------------|----------|------------------------------------------------------------------------|-----------------------|----------------------------------------|-------------------------------|----------------------------------|-----------------------------|-----------------------------|-----------------------------------------------------------------------------------------------------------------------------|------------------------------------|-------------------------------------------------------------|
| Rossetti 2010          | 20373341 | Either pupillary, corneal or oculocephalic reflexes absent bilaterally | 36-72 hours from ROSC | Mortality in-hospital, all-cause       | 0.42                          | Mortality in-hospital, all-cause | 109                         | 0.59                        | FPR 0.04                                                                                                                    | High                               | Self fulfilling prophecy high                               |
| Youn 2015              | 26164682 | Four B 3 or 4- at least one pupillary or corneal reflex present        | Pupillary reflex      | <6h from ROSC                          | 0.31                          | Survival in-house, all-cause     | 331                         | 0.29                        | OR 10.21 (95% CI 4.50 to 23.16)                                                                                             | High                               | Study participation moderate, Self-fulfilling prophecy high |

## Pupillary light response and Corneal reflex as predictors of mortality

|                   |          |                                 |                  |            |      |                  |     |      |                                                                                           |          |                                   |
|-------------------|----------|---------------------------------|------------------|------------|------|------------------|-----|------|-------------------------------------------------------------------------------------------|----------|-----------------------------------|
| Limpawattana 2018 | 29593417 | Pupillary light response absent | Pupillary reflex | Not stated | 0.35 | Mortality 1 year | 202 | 0.92 | Adjusted hazard ratio 2.529 (95%CI 1.378 - 4.642), p=0.003 in multivariate best-fit model | Moderate | Self fulfilling prophecy moderate |
|-------------------|----------|---------------------------------|------------------|------------|------|------------------|-----|------|-------------------------------------------------------------------------------------------|----------|-----------------------------------|

## Motor response as a predictor of functional outcome

| FIRST AUTHOR LAST NAME | PMID    | PROGNOSTIC FACTOR(S) EVALUATED  | Timing of prognostic factor evaluation | Prevalence % of the predictor | OUTCOME(S)                                                                          | Sample size for the outcome | Prevalence % of the outcome | EFFECT SIZE WITH 95% CI as reported in the study (False Positive Rate, Sensitivity, Specificity, Odds Ratio, Relative Risk) | OVERALL RISK OF BIAS FOR THE STUDY | Overall risk of bias: Comments                                                           |
|------------------------|---------|---------------------------------|----------------------------------------|-------------------------------|-------------------------------------------------------------------------------------|-----------------------------|-----------------------------|-----------------------------------------------------------------------------------------------------------------------------|------------------------------------|------------------------------------------------------------------------------------------|
| Levy 1985              | 3968772 | Motor response flexion or worse | Day 3                                  | 0.33                          | Poor functional outcome- Severe disability (dependence for some functions) or worse | 210                         | 0.88                        | FPR 0% (0-7%)                                                                                                               | High                               | Study confounding moderate, Self fulfilling prophecy high                                |
| Edgren 1994            | 7909098 | Motor response absent           | 72h from ROSC                          | 0.16                          | CPC 3-5 at 6-12 months                                                              | 262                         | 0.54                        | FPR 0                                                                                                                       | High                               | Study confounding moderate, Statistical analysis moderate, Self fulfilling prophecy high |
| Rossetti 2010          | 2E+07   | GCS M 1 or 2                    | 36-72 hours from ROSC                  | 0.62                          | CPC 3-5 at 3-6 months                                                               | 109                         | 0.77                        | FPR 0.16                                                                                                                    | High                               | Self fulfilling prophecy high                                                            |

## Motor response as a predictor of functional outcome

|                |         |                                       |                           |                          |                       |     |      |                                                                                        |          |                                                                                                                  |
|----------------|---------|---------------------------------------|---------------------------|--------------------------|-----------------------|-----|------|----------------------------------------------------------------------------------------|----------|------------------------------------------------------------------------------------------------------------------|
| Wu 2011        | 2.1E+07 | GCS M 1 or 2                          | 72h from ROSC             | 0.72                     | mRS>4 at 6 months     | 151 | 0.91 | Sensitivity 82% (72–89), Specificity 79% (49–94), significant in multivariate analysis | High     | Study participation moderate, Self-fulfilling prophecy high                                                      |
| Greer 2013     | 2.4E+07 | GCS motor response extensor or absent | Day 3, Day 7              | Day 3- 0.65, Day 7- 0.49 | mRS 4-6 at 6 months   | 200 | 0.90 | Day 3- FPR 0.3, Sensitivity 0.81. Day 7- FPR 0.05, Sensitivity 0.74.                   | High     | Study confounding moderate, Self-fulfilling prophecy high                                                        |
| Dragancea 2015 | 2.6E+07 | GCS M 1 or 2                          | Median 117 (93-137) hours | 0.73                     | CPC 3-5 at 3-6 months | 312 | 0.85 | FPR 0.19 (0.10–0.33), Sensitivity 82.3% (77.2–86.4)                                    | Moderate | Study participation moderate, Study confounding moderate, Self-fulfilling prophecy moderate. TTM trial substudy. |

## Motor response as a predictor of functional outcome

|              |         |                      |                                                              |      |                     |     |      |                                                                                   |          |                                                                                             |
|--------------|---------|----------------------|--------------------------------------------------------------|------|---------------------|-----|------|-----------------------------------------------------------------------------------|----------|---------------------------------------------------------------------------------------------|
| Hifumi 2015  | 2.6E+07 | GCS-M4-5             | Immediately after admission, without sedation or paralytics. | 0.08 | CPC 1-2 at 90 days  | 302 | 0.57 | OR 8.18 (1.9-60.28), p<0.01. Sensitivity 12% (7 - 17), Specificity 98% (93 - 99). | High     | Prognostic factor measurement high                                                          |
| Velly 2018   | 3E+07   | GCS M 1 or 2         | Day 7                                                        | 0.57 | CPC 3-5 at 6 months | 150 | 0.78 | FPR 0.15, OR 12.60 (4.85-39.49), p<0.0001                                         | High     | Study participation high, Prognostic factor measurement high, Self-fulfilling prophecy high |
| Ebner 2019   | 3.1E+07 | GCS-M=2-5 vs GCS-M=1 | Median 117 hours                                             | 0.49 | CPC 3-5 at 6 months | 869 | 0.49 | OR 0.4 (0.28-0.57), p<0.001                                                       | Moderate | Study participation moderate, Self-fulfilling prophecy moderate. TTM trial substudy.        |
| Nakstad 2020 | 3.2E+07 | GCS M 1-3            | >72h                                                         | 0.49 | CPC 3-5 at 6 months | 185 | 0.51 | FPR 0.27 (0.18-0.37)                                                              | High     | Study confounding moderate, Self-fulfilling prophecy high                                   |

## Motor response as a predictor of functional outcome

|                |         |                                                        |                  |      |                        |     |      |                                                  |      |                                                                      |
|----------------|---------|--------------------------------------------------------|------------------|------|------------------------|-----|------|--------------------------------------------------|------|----------------------------------------------------------------------|
| Nobile<br>2020 | 3.2E+07 | Motor<br>response-<br>absent or<br>posturing at<br>72h | 72h from<br>ROSC | 0.53 | CPC 3-5 at 3<br>months | 532 | 0.63 | AUC 0.77<br>(95% CI 0.72<br>to 0.81),<br>p<0.001 | High | Study<br>participation<br>high, Self-<br>fulfilling<br>prophecy High |
|----------------|---------|--------------------------------------------------------|------------------|------|------------------------|-----|------|--------------------------------------------------|------|----------------------------------------------------------------------|

## Motor response as a predictor of mortality

| FIRST<br>AUTHOR<br>LAST<br>NAME | PMID     | PROGNOSTIC<br>FACTOR(S)<br>EVALUATED | Timing of<br>prognostic<br>factor<br>evaluation | Prevalence<br>% of the<br>predictor | OUTCOME(S)                               | Sample<br>size for<br>the<br>outcome | Prevalence<br>% of the<br>outcome | EFFECT SIZE<br>WITH 95%<br>CI as<br>reported in<br>the study<br>(False<br>Positive<br>Rate,<br>Sensitivity,<br>Specificity,<br>Odds Ratio,<br>Relative<br>Risk) | OVERALL<br>RISK OF<br>BIAS FOR<br>THE<br>STUDY | Overall risk<br>of bias:<br>Comments   |
|---------------------------------|----------|--------------------------------------|-------------------------------------------------|-------------------------------------|------------------------------------------|--------------------------------------|-----------------------------------|-----------------------------------------------------------------------------------------------------------------------------------------------------------------|------------------------------------------------|----------------------------------------|
| Grubb<br>1995                   | 7623574  | GCS<6                                | 72h from<br>ROSC                                | 0.10                                | Mortality in-<br>hospital, all-<br>cause | 270                                  | 0.51                              | FPR 0%                                                                                                                                                          | High                                           | Self<br>fulfilling<br>prophecy<br>high |
| Rossetti<br>2010                | 20373341 | GCS M 1 or 2                         | 36-72<br>hours from<br>ROSC                     | 0.62                                | Mortality in-<br>hospital, all-<br>cause | 109                                  | 0.59                              | FPR 24%                                                                                                                                                         | High                                           | Self<br>fulfilling<br>prophecy<br>high |

## Early myoclonus as a predictor of functional outcome

| FIRST AUTHOR LAST NAME | PMID     | PROGNOSTIC FACTOR(S) EVALUATED | Timing of prognostic factor evaluation | Prevalence % of the predictor | OUTCOME(S)          | Sample size for the outcome | Prevalence % of the outcome | EFFECT SIZE WITH 95% CI as reported in the study (False Positive Rate, Sensitivity, Specificity, Odds Ratio, Relative Risk) | OVERALL RISK OF BIAS FOR THE STUDY | Overall risk of bias: Comments                                                                |
|------------------------|----------|--------------------------------|----------------------------------------|-------------------------------|---------------------|-----------------------------|-----------------------------|-----------------------------------------------------------------------------------------------------------------------------|------------------------------------|-----------------------------------------------------------------------------------------------|
| Greer 2013             | 23954666 | Status myoclonus               | First 24 hours                         | 0.31                          | mRS 4-6 at 6 months | 200                         | 0.90                        | FPR 0.10, Sensitivity-0.33                                                                                                  | High                               | Prognostic factor measurement high, Study confounding moderate, Self-fulfilling prophecy high |



## Early myoclonus as a predictor of functional outcome

|                  |          |                     |                                                                                                                                                                                                                                          |      |                           |     |      |                                                           |      |                                                                                                                      |
|------------------|----------|---------------------|------------------------------------------------------------------------------------------------------------------------------------------------------------------------------------------------------------------------------------------|------|---------------------------|-----|------|-----------------------------------------------------------|------|----------------------------------------------------------------------------------------------------------------------|
| Rossetti<br>2010 | 20373341 | Status<br>myoclonus | Within 24<br>hours of<br>weaning<br>sedation.<br>Therapeutic<br>hypothermia<br>was used for<br>all patients<br>for 24 hours.<br>Sedation<br>was then<br>stopped<br>after passive<br>rewarming<br>to a central<br>temperature<br>of 35°C. | 0.33 | CPC 3-5 at 3-<br>6 months | 109 | 0.77 | FPR 0.04                                                  | High | Prognostic<br>factor<br>measurement<br>high, Self<br>fulfilling<br>prophecy high                                     |
| Velly<br>2018    | 29500154 | Status<br>myoclonus | Not stated                                                                                                                                                                                                                               | 0.14 | CPC 3-5 at 6<br>months    | 150 | 0.78 | FPR 0, OR<br>$3.98 \times 10^7$<br>(0.00–NA),<br>p=0.9902 | High | Study<br>participation<br>high,<br>Prognostic<br>factor<br>measurement<br>high, Self-<br>fulfilling<br>prophecy high |

## Early myoclonus as a predictor of mortality

| FIRST AUTHOR LAST NAME | PMID     | PROGNOSTIC FACTOR(S) EVALUATED | Timing of prognostic factor evaluation                                                                                                                                                   | Prevalence % of the predictor | OUTCOME(S)                       | Sample size for the outcome | Prevalence % of the outcome | EFFECT SIZE WITH 95% CI as reported in the study (False Positive Rate, Sensitivity, Specificity, Odds Ratio, Relative Risk) | OVERALL RISK OF BIAS FOR THE STUDY | Overall risk of bias: Comments                                    |
|------------------------|----------|--------------------------------|------------------------------------------------------------------------------------------------------------------------------------------------------------------------------------------|-------------------------------|----------------------------------|-----------------------------|-----------------------------|-----------------------------------------------------------------------------------------------------------------------------|------------------------------------|-------------------------------------------------------------------|
| Rossetti 2010          | 20373341 | Status myoclonus               | Within 24 hours of weaning sedation. Therapeutic hypothermia was used for all patients for 24 hours. Sedation was then stopped after passive rewarming to a central temperature of 35°C. | 0.33                          | Mortality in-hospital, all-cause | 111                         | 0.59                        | FPR 0.04                                                                                                                    | High                               | Prognostic factor measurement high, Self fulfilling prophecy high |

## CT diffuse loss of grey white differentiation and sulcal effacement as a predictor of functional outcome

| FIRST AUTHOR LAST NAME | PMID     | PROGNOSTIC FACTOR(S) EVALUATED                                      | Timing of prognostic factor evaluation | Prevalence % of the predictor    | OUTCOME(S)        | Sample size for the outcome | Prevalence % of the outcome | EFFECT SIZE WITH 95% CI as reported in the study (False Positive Rate, Sensitivity, Specificity, Odds Ratio, Relative Risk) | OVERALL RISK OF BIAS FOR THE STUDY | Overall risk of bias: Comments                              |
|------------------------|----------|---------------------------------------------------------------------|----------------------------------------|----------------------------------|-------------------|-----------------------------|-----------------------------|-----------------------------------------------------------------------------------------------------------------------------|------------------------------------|-------------------------------------------------------------|
| Wu 2011                | 21330629 | CT Hounsfield units whole brain                                     | ≤72h from ROSC                         | Not stated, threshold not stated | mRS>4 at 6 months | 151                         | 0.91                        | Sensitivity 1% (0–7), Specificity 100% (73–100), significant in multivariate analysis                                       | High                               | Study participation moderate, Self-fulfilling prophecy high |
| Wu 2011                | 21330629 | CT Hounsfield units whole putamen + posterior limb internal capsule | ≤72h from ROSC                         | Not stated, threshold not stated | mRS>4 at 6 months | 151                         | 0.91                        | Sensitivity 25% (15–33), Specificity 100% (73–100), significant in multivariate analysis                                    | High                               | Study participation moderate, Self-fulfilling prophecy high |

## CT diffuse loss of grey white differentiation and sulcal effacement as a predictor of functional outcome

|                    |          |                                                                   |                        |                                  |                     |     |      |                                                                                        |      |                                                                                                                                                     |
|--------------------|----------|-------------------------------------------------------------------|------------------------|----------------------------------|---------------------|-----|------|----------------------------------------------------------------------------------------|------|-----------------------------------------------------------------------------------------------------------------------------------------------------|
| Wu 2011            | 21330629 | CT Hounsfield units whole putamen/posterior limb internal capsule | ≤72 h from ROSC        | Not stated, threshold not stated | mRS>4 at 6 months   | 151 | 0.91 | Sensitivity 8% (4–16), Specificity 100% (73–100), significant in multivariate analysis | High | Study participation moderate, Self-fulfilling prophecy high                                                                                         |
| Hong 2019          | 30953628 | CT-Grey-white ratio                                               | Within 2 hours of ROSC | Continuous                       | CPC 3-5 at 6 months | 512 | 0.68 | Multivariate analysis: GWRaverage p=0.727, GWRbasal ganglia                            | High | Prognostic factor measurement high                                                                                                                  |
| Moseby-Knappe 2018 | 30383090 | CT Gen edema                                                      | Median 23 (2-19) hours | 0.25                             | CPC 3-5 at 6 months | 261 | 0.65 | Sensitivity 37%, Specificity 97%                                                       | High | Study participation moderate, Prognostic factor measurement high, Study confounding moderate, Self-fulfilling prophecy moderate. TTM trial substudy |

## CT diffuse loss of grey white differentiation and sulcal effacement as a predictor of mortality

| FIRST<br>AUTHOR<br>LAST NAME | PMID     | PROGNOSTIC<br>FACTOR(S)<br>EVALUATED | Timing of<br>prognostic<br>factor<br>evaluation | Prevalence<br>% of the<br>predictor    | OUTCOME(S)                               | Sample size<br>for the<br>outcome | Prevalence<br>% of the<br>outcome | EFFECT SIZE<br>WITH 95%<br>CI as<br>reported in<br>the study<br>(False<br>Positive<br>Rate,<br>Sensitivity,<br>Specificity,<br>Odds Ratio,<br>Relative<br>Risk) | OVERALL<br>RISK OF<br>BIAS FOR<br>THE STUDY | Overall risk<br>of bias:<br>Comments                                                                   |
|------------------------------|----------|--------------------------------------|-------------------------------------------------|----------------------------------------|------------------------------------------|-----------------------------------|-----------------------------------|-----------------------------------------------------------------------------------------------------------------------------------------------------------------|---------------------------------------------|--------------------------------------------------------------------------------------------------------|
| Chang<br>2019                | 31521958 | CT TENS score                        | Prior to<br>TTM                                 | TENS >0 in<br>0.38, TENS<br>>1 in 0.20 | Mortality in-<br>hospital, all-<br>cause | 341                               | 0.64                              | p<0.05 for<br>TENS >0<br>and p<0.01<br>for TENS >1                                                                                                              | High                                        | Study confoundin<br>g high,<br>Statistical<br>analysis<br>high, Self<br>fulfilling<br>prophecy<br>high |
| Fisher 2020                  | 33021889 | CT- cerebral<br>edema                | In<br>emergency<br>departmen<br>t               | 0.16                                   | Mortality in-<br>hospital, all-<br>cause | 254                               | 0.30                              | Adjusted<br>OR 13.7,<br>95% CI<br>3.26–57.4                                                                                                                     | High                                        | Prognostic<br>factor<br>measureme<br>nt high, Self<br>fulfilling<br>prophecy<br>high                   |

## MRI diffuse restricted diffusion as a predictor of functional outcome

| FIRST AUTHOR LAST NAME | PMID     | PROGNOSTIC FACTOR(S) EVALUATED                                  | Timing of prognostic factor evaluation | Prevalence % of the predictor | OUTCOME(S)          | Sample size for the outcome | Prevalence % of the outcome | EFFECT SIZE WITH 95% CI as reported in the study (False Positive Rate, Sensitivity, Specificity, Odds Ratio, Relative Risk)       | OVERALL RISK OF BIAS FOR THE STUDY | Overall risk of bias: Comments                           | Other comments |
|------------------------|----------|-----------------------------------------------------------------|----------------------------------------|-------------------------------|---------------------|-----------------------------|-----------------------------|-----------------------------------------------------------------------------------------------------------------------------------|------------------------------------|----------------------------------------------------------|----------------|
| Oh 2019                | 31215475 | MRI DWI No lesion                                               | After Normothermia,>38-48h from ROSC   | 0.23                          | CPC 1-2 at 6 months | 134                         | 0.27                        | Sensitivity 72.2% (95%CI 54.8–85.8), Specificity 94.9% (95%CI 88.5–98.3). AUC 0.94 (95%CI, 0.88–0.97). AUC 0.94 (95%CI 0.88–0.97) | Moderate                           | Study participation moderate, Study confounding moderate |                |
| Oh 2019                | 31215475 | MRI DWI No lesion or isolated cortex or deep gray matter lesion | After Normothermia,>38-48h from ROSC   | 0.31                          | CPC 1-2 at 6 months | 134                         | 0.27                        | Sensitivity 94.4% (95%CI 81.3–99.3), Specificity 91.8% (95%CI 84.6–96.4). AUC 0.94 (95%CI, 0.88–0.97)                             | Moderate                           | Study participation moderate, Study confounding moderate |                |
| Oh 2019                | 31215475 | MRI DWI multifocal or global lesions                            | After Normothermia,>38-48h from ROSC   | 0.69                          | CPC 3-5 at 6 months | 134                         | 0.73                        | Sensitivity 91.8% (95%CI 84.6–96.4), Specificity 94.4% (95%CI 81.3–99.3)                                                          | Moderate                           | Study participation moderate, Study confounding moderate |                |

## MRI diffuse restricted diffusion as a predictor of functional outcome

|            |          |                                                                                                          |          |                                                                     |                     |     |      |                                                                                                                                                                                                                                                                                                                                                                                                                                                                                                  |      |                                                         |                                                                                                                                                                                                                                                                                           |
|------------|----------|----------------------------------------------------------------------------------------------------------|----------|---------------------------------------------------------------------|---------------------|-----|------|--------------------------------------------------------------------------------------------------------------------------------------------------------------------------------------------------------------------------------------------------------------------------------------------------------------------------------------------------------------------------------------------------------------------------------------------------------------------------------------------------|------|---------------------------------------------------------|-------------------------------------------------------------------------------------------------------------------------------------------------------------------------------------------------------------------------------------------------------------------------------------------|
| Velly 2018 | 29500154 | MRI FLAIR-DWI intensity presence in cortex and deep grey matter, and FLAIR-DWI scoring system. Also DTI. | Day 7-28 | FLAIR- DWI hyperintensity in deep grey nuclei 0.66, in cortex 0.45. | CPC 3-5 at 6 months | 148 | 0.78 | FLAIR-DWI OVERALL SCORE: AUC 0.83 (0.76–0.90), For cutoff $\geq 41$ , Specificity 100% (89–100), Sensitivity 40% (31–50), PPV 100% (92–100), NPV 32% (23–42). FLAIR-DWI CORTEX SCORE: AUC 0.75 (0.67–0.84), For cutoff $\geq 30$ , Specificity 100% (89–100), Sensitivity 33% (25–42), PPV 100% (91–100), NPV 30% (22–39). FLAIR-DWI CORTEX PLUS DEEP GREY NUCLEI SCORE: AUC 0.81 (0.74–0.88), For cutoff $\geq 41$ , Specificity 100% (89–100), Sensitivity 37% (28–46), PPV 100% (92–100), NPV | High | Study participation high, Self-fulfilling prophecy high | MRI FLAIR-DWI score: The adjudicators were instructed to only score MRI abnormalities that could be attributed to acute global hypoxic-ischemic brain injury. The brain regions were: cortical gray matter and subcortical white matter in the frontal, parietal, temporal, and occipital |
|------------|----------|----------------------------------------------------------------------------------------------------------|----------|---------------------------------------------------------------------|---------------------|-----|------|--------------------------------------------------------------------------------------------------------------------------------------------------------------------------------------------------------------------------------------------------------------------------------------------------------------------------------------------------------------------------------------------------------------------------------------------------------------------------------------------------|------|---------------------------------------------------------|-------------------------------------------------------------------------------------------------------------------------------------------------------------------------------------------------------------------------------------------------------------------------------------------|

## MRI diffuse restricted diffusion as a predictor of functional outcome

|           |          |                                                                           |                                                                                                                                                                              |                                                                  |                     |                                            |      |                                                                                                                                                                                                                                                         |          |                              |                                                                                                                                                                                                                                                                       |
|-----------|----------|---------------------------------------------------------------------------|------------------------------------------------------------------------------------------------------------------------------------------------------------------------------|------------------------------------------------------------------|---------------------|--------------------------------------------|------|---------------------------------------------------------------------------------------------------------------------------------------------------------------------------------------------------------------------------------------------------------|----------|------------------------------|-----------------------------------------------------------------------------------------------------------------------------------------------------------------------------------------------------------------------------------------------------------------------|
| Moon 2018 | 29474879 | MRI apparent diffusion coefficient (ADC) value-average across all voxels. | Within 7 days of ROSC. Early (within 48 h after return of spontaneous circulation (ROSC)) and late group (between 48 h and 7 days after ROSC) according to the DWI scan time | Continuous. No further data on prevalence of specific thresholds | CPC 3-5 at 6 months | 96 patients, 110 scans. Early 44, Late 66. | 0.68 | Mean ADC was not an independent predictor in the logistic regression analysis in the early group, but was in the late group (OR 0.98, 95% CI 0.97–0.99). In the late group AUC 0.82 (0.71–0.91), sensitivity 21% (11–35) and specificity 100% (82–100). | Moderate | Study participation moderate | The standard of $b=1000$ s/mm <sup>2</sup> was used for all DWIs. Voxels with ADC values under $50 \times 10^{-6}$ mm <sup>2</sup> /s or above $1200 \times 10^{-6}$ mm <sup>2</sup> /s were extracted from the analysis to exclude artifacts or cerebrospinal fluid. |
|-----------|----------|---------------------------------------------------------------------------|------------------------------------------------------------------------------------------------------------------------------------------------------------------------------|------------------------------------------------------------------|---------------------|--------------------------------------------|------|---------------------------------------------------------------------------------------------------------------------------------------------------------------------------------------------------------------------------------------------------------|----------|------------------------------|-----------------------------------------------------------------------------------------------------------------------------------------------------------------------------------------------------------------------------------------------------------------------|



## MRI diffuse restricted diffusion as a predictor of functional outcome

|           |          |                                                                                                                                                                                                                                                                                                                  |                                                                                                                                                                              |                                                                  |                     |                                            |      |                                                                                                                                                                                                                                                                                                                                                                                                                                                                                                                             |          |                              |                                                                                                                                                                                                                                                                          |
|-----------|----------|------------------------------------------------------------------------------------------------------------------------------------------------------------------------------------------------------------------------------------------------------------------------------------------------------------------|------------------------------------------------------------------------------------------------------------------------------------------------------------------------------|------------------------------------------------------------------|---------------------|--------------------------------------------|------|-----------------------------------------------------------------------------------------------------------------------------------------------------------------------------------------------------------------------------------------------------------------------------------------------------------------------------------------------------------------------------------------------------------------------------------------------------------------------------------------------------------------------------|----------|------------------------------|--------------------------------------------------------------------------------------------------------------------------------------------------------------------------------------------------------------------------------------------------------------------------|
| Moon 2018 | 29474879 | MRI apparent diffusion coefficient (ADC) value measured in all voxels. Percentage of voxels below the specified apparent ADC value was the predictor. The ADC thresholds ranged from 400 to $750 \times 10^{-6} \text{ mm}^2/\text{s}$ and were analyzed at $50 \times 10^{-6} \text{ mm}^2/\text{s}$ intervals. | Within 7 days of ROSC. Early (within 48 h after return of spontaneous circulation (ROSC)) and late group (between 48 h and 7 days after ROSC) according to the DWI scan time | Continuous. No further data on prevalence of specific thresholds | CPC 3-5 at 6 months | 96 patients, 110 scans. Early 44, Late 66. | 0.68 | ADC threshold of $400 \times 10^{-6} \text{ mm}^2/\text{s}$ -percentage voxels below this threshold of 2.5% had AUC 0.90 (0.84-0.95), Sensitivity 67% (55-78), Specificity 100% (91-100). In the early group, AUC was 0.89 (0.79-0.99), sensitivity 64% (43-82) and specificity 100% (82-100). Thresholds of 400-600 achieved statistical significance in the logistic regression analysis in the early group, while all thresholds (400-750) achieved statistical significance in logistic regression analysis in the late | Moderate | Study participation moderate | The standard of $b=1000 \text{ s/mm}^2$ was used for all DWIs. Voxels with ADC values under $50 \times 10^{-6} \text{ mm}^2/\text{s}$ or above $1200 \times 10^{-6} \text{ mm}^2/\text{s}$ were extracted from the analysis to exclude artifacts or cerebrospinal fluid. |
|-----------|----------|------------------------------------------------------------------------------------------------------------------------------------------------------------------------------------------------------------------------------------------------------------------------------------------------------------------|------------------------------------------------------------------------------------------------------------------------------------------------------------------------------|------------------------------------------------------------------|---------------------|--------------------------------------------|------|-----------------------------------------------------------------------------------------------------------------------------------------------------------------------------------------------------------------------------------------------------------------------------------------------------------------------------------------------------------------------------------------------------------------------------------------------------------------------------------------------------------------------------|----------|------------------------------|--------------------------------------------------------------------------------------------------------------------------------------------------------------------------------------------------------------------------------------------------------------------------|

## MRI diffuse restricted diffusion as a predictor of functional outcome

|             |          |                                                                           |                                 |                    |                                                                  |                   |      |                                                                                                                                                                            |          |                                                          |                                                                                                                      |
|-------------|----------|---------------------------------------------------------------------------|---------------------------------|--------------------|------------------------------------------------------------------|-------------------|------|----------------------------------------------------------------------------------------------------------------------------------------------------------------------------|----------|----------------------------------------------------------|----------------------------------------------------------------------------------------------------------------------|
| Hirsch 2020 | 32269116 | >10% of brain tissue with an ADC $<650 \times 10^{-6}$ mm <sup>2</sup> /s | Within 7 days of cardiac arrest | Not clearly stated | Glasgow Outcome Scale score of $\leq 2$ at 6 months after arrest | 97 (100 enrolled) | 0.57 | Sensitivity of 0.63 (95% confidence interval [CI] 0.42-0.80), a specificity of 0.96 (95% CI 0.77-0.998), and a positive predictive value (PPV) of 0.94 (95% CI 0.71-0.997) | Moderate | Study participation moderate, Study confounding moderate | Other predictors such as pupillar reactivity, GCS M1-2 and SSEP studies, but N for these seems to be well below 100. |
|-------------|----------|---------------------------------------------------------------------------|---------------------------------|--------------------|------------------------------------------------------------------|-------------------|------|----------------------------------------------------------------------------------------------------------------------------------------------------------------------------|----------|----------------------------------------------------------|----------------------------------------------------------------------------------------------------------------------|

## MRI diffuse restricted diffusion as a predictor of mortality

| FIRST<br>AUTHOR<br>LAST<br>NAME | PMID | PROGNOSTIC<br>FACTOR(S)<br>EVALUATED | Timing of<br>prognostic<br>factor<br>evaluation | Prevalence<br>% of the<br>predictor | OUTCOME(S) | Sample<br>size for the<br>outcome | Prevalence<br>% of the<br>outcome | EFFECT SIZE<br>WITH 95%<br>CI as<br>reported<br>in the<br>study<br>(False<br>Positive<br>Rate,<br>Sensitivity,<br>Specificity,<br>Odds<br>Ratio,<br>Relative<br>Risk) | OVERALL<br>RISK OF<br>BIAS FOR<br>THE STUDY | Overall risk<br>of bias:<br>Comments |
|---------------------------------|------|--------------------------------------|-------------------------------------------------|-------------------------------------|------------|-----------------------------------|-----------------------------------|-----------------------------------------------------------------------------------------------------------------------------------------------------------------------|---------------------------------------------|--------------------------------------|
| No studies met criteria.        |      |                                      |                                                 |                                     |            |                                   |                                   |                                                                                                                                                                       |                                             |                                      |

## EEG suppression or burst suppression as a predictor of functional outcome

| FIRST<br>AUTHOR<br>LAST<br>NAME | PMID     | PROGNOSTIC<br>FACTOR(S)<br>EVALUATED                                                                                                                                                                                                                                          | Timing of<br>prognostic<br>factor<br>evaluation | Prevalence<br>% of the<br>predictor | OUTCOME(S)             | Sample<br>size for<br>the<br>outcome | Prevalence<br>% of the<br>outcome | EFFECT SIZE WITH<br>95% CI as reported in<br>the study (False<br>Positive Rate,<br>Sensitivity, Specificity,<br>Odds Ratio, Relative<br>Risk) | OVERALL<br>RISK OF<br>BIAS FOR<br>THE STUDY | Overall risk of<br>bias:<br>Comments                                                                                      |
|---------------------------------|----------|-------------------------------------------------------------------------------------------------------------------------------------------------------------------------------------------------------------------------------------------------------------------------------|-------------------------------------------------|-------------------------------------|------------------------|--------------------------------------|-----------------------------------|-----------------------------------------------------------------------------------------------------------------------------------------------|---------------------------------------------|---------------------------------------------------------------------------------------------------------------------------|
| Nakstad<br>2020                 | 31926258 | EEG grade 4-5.<br>Synek EEG Grade<br>4- burst<br>suppression,<br>generalized<br>epileptic activity<br>including status<br>myoclonus,<br>nonreactive with<br>low voltage,<br>alpha coma, theta<br>coma. Grade 5-<br>No visible activity<br>on high sensitivity<br>registration | >72h                                            | 0.29                                | CPC 3-5 at 6<br>months | 107                                  | 0.51                              | FPR 0.05 (0.01-0.15)                                                                                                                          | Moderate                                    | Prognostic<br>factor<br>measurement<br>moderate,<br>Study<br>confounding<br>moderate,<br>Self fulfilling<br>prophecy high |
| Ruitjer<br>2019                 | 31155751 | EEG-<br>Unfavorable.<br>Unfavorable EEG-<br>Generalized EEG<br>suppression (all<br>activity <10 $\mu$ V)<br>and<br>synchronous<br>patterns with<br>≥50% suppression                                                                                                           | 6-120 hours                                     | 0.24                                | CPC 3-5 at 6<br>months | 469                                  | 0.25                              | Beta coefficient 5.922<br>(SE 1.40), p<0.001.<br>FPR 0% for<br>suppression,<br>synchronous burst<br>suppression and and<br>GPD.               | High                                        | Study<br>participation<br>moderate,<br>Self-fulfilling<br>prophecy high                                                   |

## EEG suppression or burst suppression as a predictor of functional outcome

|                  |          |                                                                |                          |                          |                        |     |      |                                                                                                                                                                                                                                                                                                                                                                                                                                                                                                                                                                                                                                             |          |                                                                          |
|------------------|----------|----------------------------------------------------------------|--------------------------|--------------------------|------------------------|-----|------|---------------------------------------------------------------------------------------------------------------------------------------------------------------------------------------------------------------------------------------------------------------------------------------------------------------------------------------------------------------------------------------------------------------------------------------------------------------------------------------------------------------------------------------------------------------------------------------------------------------------------------------------|----------|--------------------------------------------------------------------------|
| Ruitjer<br>2019  | 31155751 | EEG- Favorable.<br>Favorable EEG-<br>Continuous EEG<br>pattern | 6-120 hours              | 0.29                     | CPC 1-2 at 6<br>months | 469 | 0.75 | Beta coefficient 2.531<br>(SE 0.314), $p < 0.001$                                                                                                                                                                                                                                                                                                                                                                                                                                                                                                                                                                                           | High     | Study<br>participation<br>moderate,<br>Self-fulfilling<br>prophecy high  |
| Admiraal<br>2020 | 32651293 | EEG reactivity                                                 | 12-24 hours<br>from ROSC | 0.4 of EEG<br>recordings | CPC 3-5 at 6<br>months | 108 | 0.48 | Prognostic accuracy of<br>EEG reactivity for<br>GOOD outcome-<br>Sensitivity 75%<br>(62.1–85.3),<br>Specificity 65.2%<br>(42.7–83.6), Positive<br>predictive value 84.9%<br>(72.4–93.3), Negative<br>predictive value 50%<br>(31.3–68.7). Patients<br>with a continuous (n =<br>64) or discontinuous (n<br>= 19) normal voltage<br>background pattern<br>with reactivity were 3<br>and 8 times more<br>likely to have a good<br>outcome than without<br>reactivity (continuous:<br>Diagnostic Odds Ratio<br>DOR, 3.4; 95%<br>confidence interval<br>[CI], 0.97–12.0; $p =$<br>0.06; discontinuous:<br>DOR, 8.0; 95% CI,<br>1.0–63.97; $p =$ | Moderate | Study<br>confounding<br>moderate,<br>Statistical<br>analysis<br>moderate |

## EEG suppression or burst suppression as a predictor of functional outcome

|               |          |                                                     |                       |      |                     |     |      |                                                                                                                                              |          |                                                          |
|---------------|----------|-----------------------------------------------------|-----------------------|------|---------------------|-----|------|----------------------------------------------------------------------------------------------------------------------------------------------|----------|----------------------------------------------------------|
| Westhall 2018 | 29933239 | EEG- Absence of continuous activity within 24 hours | 12-60 hours from ROSC | 0.46 | CPC 3-5 at 6 months | 134 | 0.51 | OR 16.8 (95%CI 7.1–40.1), $p<0.001$ . PPV 0.84 (0.72–0.92), NPV 0.76 (0.65–0.85), Sensitivity 0.75 (0.63–0.85), Specificity 0.85 (0.73–0.92) | Moderate | Study participation moderate, Study confounding moderate |
| Westhall 2018 | 29933239 | EEG- Absence of continuous activity within 60 hours | 12-60 hours from ROSC | 0.23 | CPC 3-5 at 6 months | 134 | 0.51 | OR Infinite. PPV 1.00 (0.86–1.00), NPV 0.63 (0.53–0.72), Sensitivity 0.45 (0.33–0.57), Specificity 1.00 (0.93–1.00)                          | Moderate | Study participation moderate, Study confounding moderate |
| Westhall 2018 | 29933239 | EEG- epileptiform activity within 24 hours          | 12-60 hours from ROSC | 0.28 | CPC 3-5 at 6 months | 134 | 0.51 | OR 14.8 (95%CI 4.9–45.2), $p<0.001$ . PPV 0.89 (0.74–0.97), NPV 0.63 (0.53–0.73), Sensitivity 0.49 (0.37–0.61), Specificity 0.94 (0.84–0.98) | Moderate | Study participation moderate, Study confounding moderate |

## EEG suppression or burst suppression as a predictor of functional outcome

|                           |          |                                 |                                                                                                                                                                                                                            |      |                        |     |      |                                                          |          |                                                                                                                                                |
|---------------------------|----------|---------------------------------|----------------------------------------------------------------------------------------------------------------------------------------------------------------------------------------------------------------------------|------|------------------------|-----|------|----------------------------------------------------------|----------|------------------------------------------------------------------------------------------------------------------------------------------------|
| Westhall<br>2016          | 26865516 | EEG highly<br>malignant pattern | 12–36 hours<br>after<br>rewarming<br>in patients<br>who were<br>still<br>comatose,<br>typically<br>correspondi<br>ng to 48–72<br>hours after<br>the cardiac<br>arrest or<br>later if this<br>period<br>coincided<br>with a | 0.37 | CPC 3-5 at 6<br>months | 103 | 0.74 | Sensitivity 50%<br>(39–61), Specificity<br>100% (88–100) | Moderate |                                                                                                                                                |
| Moseby-<br>Knappe<br>2018 | 30383090 | EEG highly<br>malignant pattern | Median 67<br>(51-97) hrs                                                                                                                                                                                                   | 0.37 | CPC 3-5 at 6<br>months | 81  | 0.78 | Sensitivity 48%,<br>Specificity 100%                     | Moderate | Study<br>participation<br>moderate,<br>Study<br>confounding<br>moderate,<br>Self-fulfilling<br>prophecy<br>moderate.<br>TTM trial<br>substudy. |

## EEG suppression or burst suppression as a predictor of functional outcome

|               |          |                                            |                                       |      |                       |     |      |                                                                                                                                                                                                   |      |                                                                                                 |
|---------------|----------|--------------------------------------------|---------------------------------------|------|-----------------------|-----|------|---------------------------------------------------------------------------------------------------------------------------------------------------------------------------------------------------|------|-------------------------------------------------------------------------------------------------|
| Velly 2018    | 29500154 | EEG synek classification grade 4-5         | Median 3 days (IQR 2-5)               | 0.26 | CPC 3-5 at 6 months   | 136 | 0.80 | FPR for grades 4-5 was 0.04. For Grade 5-Specificity 100% (87-100), Sensitivity 5% (2-10), PPV 100% (48-100), NPV 21% (14-29). For overall Synek classification OR 3.80 (2.01-7.95), $p=0.0001$ . | High | Study participation high, Prognostic factor measurement moderate, Self-fulfilling prophecy high |
| Velly 2018    | 29500154 | EEG nonreactive                            | Median 3 days (IQR 2-5)               | 0.70 | CPC 3-5 at 6 months   | 136 | 0.80 | FPR 0.44.                                                                                                                                                                                         | High | Study participation high, Prognostic factor measurement moderate, Self-fulfilling prophecy high |
| Rossetti 2010 | 20373341 | EEG- epileptiform activity on routine EEG  | 36-72 hours from ROSC. Median 2 days. | 0.36 | CPC 3-5 at 3-6 months | 108 | 0.77 | FPR 0.12                                                                                                                                                                                          | High | Prognostic factor measurement moderate, Self-fulfilling prophecy high                           |
| Rossetti 2010 | 20373341 | EEG- nonreactive background on routine EEG | 36-72 hours from ROSC. Median 2 days. | 0.52 | CPC 3-5 at 3-6 months | 108 | 0.77 | FPR 0                                                                                                                                                                                             | High | Prognostic factor measurement moderate, Self-fulfilling prophecy high                           |



## EEG suppression or burst suppression as a predictor of functional outcome

|                      |          |                                                                          |                       |      |                        |     |      |                                                                                                    |          |                                                                              |
|----------------------|----------|--------------------------------------------------------------------------|-----------------------|------|------------------------|-----|------|----------------------------------------------------------------------------------------------------|----------|------------------------------------------------------------------------------|
| Glimmerve<br>en 2020 | 32425878 | Suppressed, or<br>synchronous<br>patterns on<br>suppressed<br>background | 12 hours<br>from ROSC | 0.4  | CPC 3-5 at 6<br>months | 97  | 0.74 | Specificity 100%<br>(87–100), Sensitivity<br>37% (28–47), PPV<br>100% (89–100), NPV<br>32% (24–43) | Moderate | Study<br>confounding<br>moderate,<br>Self-fulfilling<br>prophecy<br>moderate |
| Glimmerve<br>en 2020 | 32425878 | Suppressed, or<br>synchronous<br>patterns on<br>suppressed<br>background | 24 hours<br>from ROSC | 0.26 | CPC 3-5 at 6<br>months | 123 | 0.76 | Specificity 100%<br>(87–100), Sensitivity<br>30% (22–40), PPV<br>100% (89–100), NPV<br>32% (24–43) | Moderate | Study<br>confounding<br>moderate,<br>Self-fulfilling<br>prophecy<br>moderate |
| Glimmerve<br>en 2020 | 32425878 | Continuous EEG<br>at 12 hours                                            | 12 hours<br>from ROSC | 0.09 | CPC 1-2 at 6<br>months | 89  | 0.28 | Specificity 98%<br>(92–100), Sensitivity<br>19% (8–37), PPV 75%<br>(36–96), NPV 80%<br>(72–86)     | Moderate | Study<br>confounding<br>moderate,<br>Self-fulfilling<br>prophecy<br>moderate |
| Scarpino<br>2021     | 33819501 | Suppression or<br>burst suppression<br>on EEG at 72h                     | 72h from<br>ROSC      | 0.24 | CPC 3-5 at 6<br>months | 403 | 0.66 | FPR 4% (0-3%),<br>sensitivity 64% (56-71)                                                          | Moderate | Study<br>participation<br>moderate,<br>Study<br>confounding<br>moderate      |

## EEG suppression or burst suppression as a predictor of mortality

| FIRST<br>AUTHOR<br>LAST NAME | PMID     | PROGNOSTIC<br>FACTOR(S)<br>EVALUATED                                                                                                                                                                                                                         | Timing of<br>prognostic<br>factor<br>evaluation | Prevalence<br>% of the<br>predictor | OUTCOME(S)                           | Sample<br>size for<br>the<br>outcome | Prevalence<br>% of the<br>outcome | EFFECT SIZE WITH 95%<br>CI as reported in the<br>study (False Positive<br>Rate, Sensitivity,<br>Specificity, Odds Ratio,<br>Relative Risk) | OVERALL<br>RISK OF<br>BIAS FOR<br>THE<br>STUDY | Overall risk<br>of bias:<br>Comments                                                                                            |
|------------------------------|----------|--------------------------------------------------------------------------------------------------------------------------------------------------------------------------------------------------------------------------------------------------------------|-------------------------------------------------|-------------------------------------|--------------------------------------|--------------------------------------|-----------------------------------|--------------------------------------------------------------------------------------------------------------------------------------------|------------------------------------------------|---------------------------------------------------------------------------------------------------------------------------------|
| Youn 2015                    | 26164682 | NON-malignant EEG.<br>Malignant EEG<br>defined as- non-<br>convulsive status<br>epilepticus (NCSE),<br>convulsive status<br>epilepticus (CSE),<br>myoclonic<br>statusepilepticus<br>(MSE) and<br>generalized periodic<br>epileptiform<br>discharges (GPEDs). | <48h from<br>ROSC                               | 0.69                                | Survival in-<br>house, all-<br>cause | 331                                  | 0.29                              | OR 13.00 (95% CI 5.09<br>to 33.18)                                                                                                         | High                                           | Study<br>participation<br>moderate,<br>Prognostic<br>factor<br>measuremen<br>t moderate,<br>Self-fulfilling<br>prophecy<br>high |

## EEG suppression or burst suppression as a predictor of mortality

|           |          |              |                       |                                                                                                                                   |                                 |     |      |                                                                                                                                                                                                                                 |      |                                                                                                                                                           |
|-----------|----------|--------------|-----------------------|-----------------------------------------------------------------------------------------------------------------------------------|---------------------------------|-----|------|---------------------------------------------------------------------------------------------------------------------------------------------------------------------------------------------------------------------------------|------|-----------------------------------------------------------------------------------------------------------------------------------------------------------|
| Faro 2019 | 30586605 | EEG patterns | Within 5 days of ROSC | Never checked 0.38, Nothing malignant 0.31, Epileptiform discharges 0.04, Periodic discharges 0.05, Seizures 0.02, Polyspike 0.21 | Survival in-hospital, all-cause | 818 | 0.28 | Survival: Never checked 0.38 (0.32 – 0.43), Nothing malignant 0.29 (0.24 – 0.35), Epileptiform discharges 0.32 (0.17 – 0.50), Periodic discharges 0.27 (0.14 – 0.43), Seizures 0.17 (0.02 – 0.48), Polyspike 0.07 (0.04 – 0.12) | High | Study participation moderate, Prognostic factor measurement moderate, Study confounding moderate, Statistical analysis moderate, Self fulfilling prophecy |
|-----------|----------|--------------|-----------------------|-----------------------------------------------------------------------------------------------------------------------------------|---------------------------------|-----|------|---------------------------------------------------------------------------------------------------------------------------------------------------------------------------------------------------------------------------------|------|-----------------------------------------------------------------------------------------------------------------------------------------------------------|

## EEG suppression or burst suppression as a predictor of mortality

|               |          |                                                                                                                                                                                                                                                                                                                                                                       |                                                                                       |                                                                                                              |                                  |     |      |                                                                                                                                                                                                                                                                                                                                                                                                     |      |                                                                   |
|---------------|----------|-----------------------------------------------------------------------------------------------------------------------------------------------------------------------------------------------------------------------------------------------------------------------------------------------------------------------------------------------------------------------|---------------------------------------------------------------------------------------|--------------------------------------------------------------------------------------------------------------|----------------------------------|-----|------|-----------------------------------------------------------------------------------------------------------------------------------------------------------------------------------------------------------------------------------------------------------------------------------------------------------------------------------------------------------------------------------------------------|------|-------------------------------------------------------------------|
| Amorim 2016   | 27554945 | EEG- status epilepticus, Nonreactive or Pure suppression burst. EEG suppression burst per ACNS, pure SB if no other features present. EEG status epileptoicus per NCS SE version 1 guidelines. EEG reactivity was best obtained in first 72 hours, tested every day, defined as change in EEG background frequency or amplitude after a noxious or auditory stimulus. | EEG start at TTM, at least 10 hours. EEG background reactivity- best within 72 hours. | EEG status epilepticus 0.31, GPD 0.08, discrete seizure 0.005, Pure suppression burst 0.23, Nonreactive 0.71 | Mortality in-hospital, all-cause | 373 | 0.69 | STATUS EPILEPTICUS: Sensitivity 42% (36–49), Specificity 92% (85–96), PPV 92% (86–96), NPV 42% (36–49), FPR 0.08 (0.04–0.15). NONREACTIVE EEG BACKGROUND: Sensitivity 96% (93–98), Specificity 83% (75–89), PPV 92% (88–95), NPV 91% (83–95), FPR 0.17 (0.11–0.25). PURE SUPPRESSION BURST: Sensitivity 25% (2–31), Specificity 81% (73–88), PPV 75% (64–83), PPV 33% (28–39), FPR 0.19 (0.12–0.27) | High | Self fulfilling prophecy high                                     |
| Rossetti 2010 | 20373341 | EEG- epileptiform activity on routine EEG                                                                                                                                                                                                                                                                                                                             | 36-72 hours from ROSC. Median 2 days.                                                 | 0.35                                                                                                         | Mortality in-hospital, all-cause | 110 | 0.59 | FPR 0.09                                                                                                                                                                                                                                                                                                                                                                                            | High | Prognostic factor measurement high, Self-fulfilling prophecy high |
| Rossetti 2010 | 20373341 | EEG- epileptiform activity on routine EEG                                                                                                                                                                                                                                                                                                                             | 36-72 hours from ROSC. Median 2 days.                                                 | 0.51                                                                                                         | Mortality in-hospital, all-cause | 110 | 0.59 | FPR 0.07                                                                                                                                                                                                                                                                                                                                                                                            | High | Prognostic factor measurement high, Self-fulfilling prophecy high |

## EEG suppression or burst suppression as a predictor of mortality

|               |          |                                                                                                                                                                                                                                                                                                                                                                                                                                                                          |                                    |      |                                  |     |      |                                                                                                                                                      |      |                                                                   |
|---------------|----------|--------------------------------------------------------------------------------------------------------------------------------------------------------------------------------------------------------------------------------------------------------------------------------------------------------------------------------------------------------------------------------------------------------------------------------------------------------------------------|------------------------------------|------|----------------------------------|-----|------|------------------------------------------------------------------------------------------------------------------------------------------------------|------|-------------------------------------------------------------------|
| Rossetti 2007 | 17636063 | EEG status epilepticus. One EEG certified author (A.O.R.) reviewed retrospectively on two parallel computerized databases all reports and selected tracings. SE was defined by prolonged (>5 minutes) spontaneous or stimulus-induced occurrence of repetitive or rhythmic focal or generalized spikes, sharp waves, spike and waves, or rhythmic waves evolving in amplitude, frequency, or field. Spontaneous burst-suppression with epileptiform bursts and PEDs were | Median 2 days (10% to 90%: 1 to 4) | 0.33 | Mortality in-hospital, all-cause | 107 | 0.66 | FPR 0.38. Multivariate analysis goodness of fit was valid only in patients treated with hypothermia, N=63- for status epilepticus, OR was 14 (3-75). | High | Prognostic factor measurement high, Self fulfilling prophecy high |
|---------------|----------|--------------------------------------------------------------------------------------------------------------------------------------------------------------------------------------------------------------------------------------------------------------------------------------------------------------------------------------------------------------------------------------------------------------------------------------------------------------------------|------------------------------------|------|----------------------------------|-----|------|------------------------------------------------------------------------------------------------------------------------------------------------------|------|-------------------------------------------------------------------|

## Somatosensory evoked potentials (SSEP) as a predictor of functional outcome

| FIRST AUTHOR LAST NAME | PMID     | PROGNOSTIC FACTOR(S) EVALUATED | Timing of prognostic factor evaluation | Prevalence % of the predictor | OUTCOME(S)          | Sample size for the outcome | Prevalence % of the outcome | EFFECT SIZE WITH 95% CI as reported in the study (False Positive Rate, Sensitivity, Specificity, Odds Ratio, Relative Risk) | OVERALL RISK OF BIAS FOR THE STUDY | Overall risk of bias: Comments                                |
|------------------------|----------|--------------------------------|----------------------------------------|-------------------------------|---------------------|-----------------------------|-----------------------------|-----------------------------------------------------------------------------------------------------------------------------|------------------------------------|---------------------------------------------------------------|
| Nakstad 2020           | 31926258 | SSEP bilateral N20 absent      | >72h                                   | 0.16                          | CPC 3-5 at 6 months | 50                          | 0.51                        | FPR 0 (0)                                                                                                                   | Moderate                           | Study confounding moderate, Self fulfilling prophecy moderate |
| Ruitjer 2019           | 31155751 | SSEP bilateral N20 absent      | Not stated                             | 0.39                          | CPC 3-5 at 6 months | 319                         | 0.87                        | FPR 0%                                                                                                                      | High                               | Study participation moderate, Self-fulfilling prophecy high   |
| Nobile 2020            | 32114066 | SSEP bilateral N20 absent      | After Normothermia , 48-72h from ROSC  | 0.27                          | CPC 3-5 at 3 months | 532                         | 0.63                        | Sensitivity 43%, Positive predictive value 100%                                                                             | High                               | Study participation high, Self-fulfilling prophecy High       |

## Somatosensory evoked potentials (SSEP) as a predictor of functional outcome

|         |          |                                 |                                                                                                                       |      |                     |     |      |                                                                       |          |                                                                                                                                                                                                                                                                                                                                                                                                                   |
|---------|----------|---------------------------------|-----------------------------------------------------------------------------------------------------------------------|------|---------------------|-----|------|-----------------------------------------------------------------------|----------|-------------------------------------------------------------------------------------------------------------------------------------------------------------------------------------------------------------------------------------------------------------------------------------------------------------------------------------------------------------------------------------------------------------------|
| Oh 2020 | 32169609 | SSEP<br>bilateral N20<br>absent | 75 h (IQR, 62-96) for patients with a good outcome and 70 h (IQR, 58-91) for patients with a poor outcome (p = 0.233) | 0.48 | CPC 3-5 at 6 months | 262 | 0.68 | Sensitivity 71.0% (95% CI, 63.7-77.5) and an FPR 0% (95% CI, 0.0-4.3) | Moderate | Study confounding moderate. In South Korea, withdrawal of life support is not permitted. Study excluded 8 patients who underwent WLST. 31 patients with absent N20 (vs 7 with N20s present) were permitted a DNR order and died before hospital discharge e. Limitations of active treatment and DNR orders statistically significantly higher in patients without pupillary light reflex as also corneal reflex. |
|---------|----------|---------------------------------|-----------------------------------------------------------------------------------------------------------------------|------|---------------------|-----|------|-----------------------------------------------------------------------|----------|-------------------------------------------------------------------------------------------------------------------------------------------------------------------------------------------------------------------------------------------------------------------------------------------------------------------------------------------------------------------------------------------------------------------|

## Somatosensory evoked potentials (SSEP) as a predictor of functional outcome

|         |          |                                           |                                                |      |                        |     |      |                                                                                                                               |          |                                                                      |
|---------|----------|-------------------------------------------|------------------------------------------------|------|------------------------|-----|------|-------------------------------------------------------------------------------------------------------------------------------|----------|----------------------------------------------------------------------|
| Oh 2019 | 31215475 | SSEP<br>bilateral N20<br>absent           | After<br>Normothermia<br>,>38-48h from<br>ROSC | 0.22 | CPC 3-5 at 6<br>months | 192 | 0.73 | Sensitivity<br>30.5% (95%CI<br>23.0–38.8),<br>Specificity<br>100% (95% CI<br>93.0–100.0).<br>AUC 0.65 (95%<br>CI 0.58–0.72)   | Moderate | Study<br>participation<br>moderate, Study<br>confounding<br>moderate |
| Oh 2019 | 31215475 | SSEP<br>bilateral P25<br>absent           | After<br>Normothermia<br>,>38-48h from<br>ROSC | 0.52 | CPC 3-5 at 6<br>months | 192 | 0.73 | Sensitivity<br>70.2% (95% CI<br>61.9–77.6),<br>Specificity<br>100% (95% CI<br>93.0–100.0),<br>AUC 0.85 (95%<br>CI 0.79–0.90)  | Moderate | Study<br>participation<br>moderate, Study<br>confounding<br>moderate |
| Oh 2019 | 31215475 | SSEP<br>bilateral N20<br>OR P25<br>absent | After<br>Normothermia<br>,>38-48h from<br>ROSC | 0.53 | CPC 3-5 at 6<br>months | 192 | 0.73 | Sensitivity<br>71.6% (95% CI<br>63.4–78.9),<br>Specificity<br>100% (95% CI<br>93.0–100.0).<br>AUC 0.86 (95%<br>CI, 0.80–0.90) | Moderate | Study<br>participation<br>moderate, Study<br>confounding<br>moderate |



## Somatosensory evoked potentials (SSEP) as a predictor of functional outcome

|                    |          |                            |                                       |      |                     |     |      |                                                                                                                                   |          |                                                                                                                  |
|--------------------|----------|----------------------------|---------------------------------------|------|---------------------|-----|------|-----------------------------------------------------------------------------------------------------------------------------------|----------|------------------------------------------------------------------------------------------------------------------|
| Oh 2019            | 31215475 | N20-P25 amplitude <0.64mcV | After Normothermia ,>38-48h from ROSC | 0.55 | CPC 3-5 at 6 months | 192 | 0.73 | Sensitivity 74.5% (95% CI 66.5–81.4), Specificity 100% (95% CI 93.0–100.0). AUC of N20-P25 amplitude was 0.94 (95% CI, 0.90–0.97) | Moderate | Study participation moderate, Study confounding moderate                                                         |
| Oh 2019            | 31215475 | N20-P25 amplitude >5.04mcV | After Normothermia ,>38-48h from ROSC | 0.03 | CPC 1-2 at 6 months | 192 | 0.73 | Sensitivity 9.8% (95%CI 3.3–21.4), Specificity 100% (95% CI 97.4–100.0). AUC of N20-P25 amplitude 0.94 (95% CI, 0.90–0.97)        | Moderate | Study participation moderate, Study confounding moderate                                                         |
| Moseby-Knappe 2018 | 30383090 | SSEPs bil absent N20       | Median 93 hrs                         | 0.38 | CPC 3-5 at 6 months | 170 | 0.81 | Sensitivity 47%, Specificity 97%                                                                                                  | Moderate | Study participation moderate, Study confounding moderate, Self-fulfilling prophecy moderate. TTM trial substudy. |

## Somatosensory evoked potentials (SSEP) as a predictor of functional outcome

|                   |          |                           |                                                                                                                                                                                                                              |      |                       |     |      |                                         |          |                                                                                                  |
|-------------------|----------|---------------------------|------------------------------------------------------------------------------------------------------------------------------------------------------------------------------------------------------------------------------|------|-----------------------|-----|------|-----------------------------------------|----------|--------------------------------------------------------------------------------------------------|
| Rossetti 2010     | 20373341 | SSEP bilateral N20 absent | Median 2.0-2.5 days from ROSC. At least 24 hours after weaning sedation. Therapeutic hypothermia was used for all patients for 24 hours. Sedation was then stopped after passive rewarming to a central temperature of 35°C. | 0.35 | CPC 3-5 at 3-6 months | 95  | 0.75 | FPR 0                                   | High     | Study participation moderate, Self fulfilling prophecy high                                      |
| Glimmerv een 2020 | 32425878 | SSEP bilateral N20 absent | 48-72h from ROSC                                                                                                                                                                                                             | 0.3  | CPC 3-5 at 6 months   | 138 | 0.77 | Sensitivity 39%, Specificity 100%       | Moderate | Study confounding moderate, Self-fulfilling prophecy moderate                                    |
| Scarpino 2021     | 33819501 | SSEP bilateral N20 absent | 72h from ROSC                                                                                                                                                                                                                | 0.22 | CPC 3-5 at 6 months   | 403 | 0.66 | FPR 0% (0-5%), sensitivity 53% (45-61). | Moderate | Study participation moderate, Study confounding moderate. No withdrawal of life support in Italy |

## Somatosensory evoked potentials (SSEP) as a predictor of mortality

| FIRST AUTHOR LAST NAME | PMID     | PROGNOSTIC FACTOR(S) EVALUATED | Timing of prognostic factor evaluation                                                                                                                                                                                       | Prevalence % of the predictor | OUTCOME(S)                       | Sample size for the outcome | Prevalence % of the outcome | EFFECT SIZE WITH 95% CI as reported in the study (False Positive Rate, Sensitivity, Specificity, Odds Ratio, Relative Risk) | OVERALL RISK OF BIAS FOR THE STUDY | Overall risk of bias: Comments                              |
|------------------------|----------|--------------------------------|------------------------------------------------------------------------------------------------------------------------------------------------------------------------------------------------------------------------------|-------------------------------|----------------------------------|-----------------------------|-----------------------------|-----------------------------------------------------------------------------------------------------------------------------|------------------------------------|-------------------------------------------------------------|
| Rossetti 2010          | 20373341 | SSEP bilateral N20 absent      | Median 2.0-2.5 days from ROSC. At least 24 hours after weaning sedation. Therapeutic hypothermia was used for all patients for 24 hours. Sedation was then stopped after passive rewarming to a central temperature of 35°C. | 0.33                          | Mortality in-hospital, all-cause | 100                         | 0.56                        | FPR 0                                                                                                                       | High                               | Study participation moderate, Self fulfilling prophecy high |

## Neuron Specific Enolase (NSE) as a predictor of functional outcome

| FIRST AUTHOR LAST NAME | PMID     | PROGNOSTIC FACTOR(S) EVALUATED               | Timing of prognostic factor evaluation | Prevalence % of the predictor | OUTCOME             | Sample size for the outcome | Prevalence % of the outcome | EFFECT SIZE WITH 95% CI as reported in the study (False Positive Rate, Sensitivity, Specificity, Odds Ratio, Relative Risk) | OVERALL RISK OF BIAS FOR THE STUDY | Overall risk of bias: Comments |
|------------------------|----------|----------------------------------------------|----------------------------------------|-------------------------------|---------------------|-----------------------------|-----------------------------|-----------------------------------------------------------------------------------------------------------------------------|------------------------------------|--------------------------------|
| Nakstad 2020           | 31926258 | NSE highest value > 33 mg/L                  | 24h and 48h                            | Not clearly stated            | CPC 3-5 at 6 months | 258                         | 0.51                        | FPR 0.34 (0.26-0.43)                                                                                                        | Moderate                           | Study confounding moderate     |
| Nakstad 2020           | 31926258 | NSE highest value > 60 mg/L                  | 24h and 48h                            | Not clearly stated            | CPC 3-5 at 6 months | 258                         | 0.51                        | FPR 0.07 (0.03-0.13)                                                                                                        | Moderate                           | Study confounding moderate     |
| Nakstad 2020           | 31926258 | NSE highest value > 60 mg/L                  | 24h and 48h                            | Not clearly stated            | CPC 3-5 at 6 months | 258                         | 0.51                        | FPR 0.07 (0.03-0.13)                                                                                                        | Moderate                           | Study confounding moderate     |
| Nakstad 2020           | 31926258 | NSE highest value > 80 mg/L                  | 24h and 48h                            | Not clearly stated            | CPC 3-5 at 6 months | 258                         | 0.51                        | FPR 0.02 (0.01-0.07)                                                                                                        | Moderate                           | Study confounding moderate     |
| Nakstad 2020           | 31926258 | NSE increases after 24 h                     | 24h and 48h                            | Not clearly stated            | CPC 3-5 at 6 months | 225                         | 0.51                        | FPR 0.32 (0.24-0.41)                                                                                                        | Moderate                           | Study confounding moderate     |
| Nakstad 2020           | 31926258 | NSE increases after 24 h and exceeds 60 mg/L | 24h and 48h                            | Not clearly stated            | CPC 3-5 at 6 months | 69                          | 0.51                        | FPR 0.13 (0.01-0.53)                                                                                                        | Moderate                           | Study confounding moderate     |

## Neuron Specific Enolase (NSE) as a predictor of functional outcome

|                 |          |                                                          |                       |                          |                        |     |      |                                                                               |          |                                     |
|-----------------|----------|----------------------------------------------------------|-----------------------|--------------------------|------------------------|-----|------|-------------------------------------------------------------------------------|----------|-------------------------------------|
| Nakstad<br>2020 | 31926258 | NSE<br>increases<br>after 24 h<br>and exceeds<br>80 mg/L | 24h and 48h           | Not<br>clearly<br>stated | CPC 3-5 at 6<br>months | 50  | 0.51 | FPR 0 (0)                                                                     | Moderate | Study<br>confounding<br>moderate    |
| Deye<br>2020    | 32858156 | NSE at 48<br>hours,<br>criterion<br>38.3 mcg/L           | 48 hours from<br>ROSC | Continuo<br>us           | CPC 3-5 at 3<br>months | 330 | 0.67 | Sensitivity 92.3%,<br>Specificity 59.6%, AUC<br>0.776 [95%CI 0.716-<br>0.837] | High     | Self fulfilling<br>prophecy<br>high |

## Neuron Specific Enolase (NSE) as a predictor of functional outcome

|              |          |                                             |                                                                                                                                                                                                                                                                                                                            |      |                     |     |      |                                                                                                                                                                                                                                                                                                                                                                                                                                                                                                                                                                                                          |          |                                                          |
|--------------|----------|---------------------------------------------|----------------------------------------------------------------------------------------------------------------------------------------------------------------------------------------------------------------------------------------------------------------------------------------------------------------------------|------|---------------------|-----|------|----------------------------------------------------------------------------------------------------------------------------------------------------------------------------------------------------------------------------------------------------------------------------------------------------------------------------------------------------------------------------------------------------------------------------------------------------------------------------------------------------------------------------------------------------------------------------------------------------------|----------|----------------------------------------------------------|
| Rafecas 2020 | 30935900 | Delta NSE $\geq$ 1 (increase, not decrease) | The best OHCA-NSE1 time interval appeared to be 18 to 24 hours (AUC 0.9389, 95% CI, 0.8692-1.000, including 38 patients). The best OHCA-NSE2 time interval appeared to be 69 to 77 hours (AUC 0.9910, 95%, CI 0.9657-1.000 with 21 patients). There was, however, remarkable overlap of CI in all assessed time intervals. | 0.35 | CPC 3-5 at 6 months | 150 | 0.41 | Positive Delta-NSE had a sensitivity of 63.8% for predicting CPC 3-5 and negative Delta-NSE had a specificity of 86.5% for CPC 1-2; positive predictive value was 77.2% and negative predictive value was 76.9%. As continuous variable, OR 1.016 (95% CI, 1.008-1.024), $P < .001$ , for 1% increase. This was also true for Delta-NSE as a binary variable: OR 11.58 (95% CI, 4.89-27.41), $P < .001$ . Among patients with a high first NSE $> 33$ ng/mL, 32 of 33 patients with CPC 3-5 had increasing NSE. 60.0% of patients with NSE1 $> 33$ ng/mL and decreasing NSE had good prognosis (CPC 1-2) | High     | Self fulfilling prophecy moderate                        |
| Oh 2019      | 31215475 | Peak NSE $> 41.7$ ng/mL                     | Immediately after ROSC and repeated 24, 48, and 72 h later.                                                                                                                                                                                                                                                                | 0.59 | CPC 3-5 at 6 months | 160 | 0.70 | Sensitivity 81.3% (95%CI 72.8–88.0), Specificity 91.7% (95%CI 80.0–97.7). AUC of NSE 0.91 (95% CI, 0.86–0.95)                                                                                                                                                                                                                                                                                                                                                                                                                                                                                            | Moderate | Study participation moderate, Study confounding moderate |

## Neuron Specific Enolase (NSE) as a predictor of functional outcome

|              |          |                        |                                                             |            |                     |     |      |                                                                                                                |          |                                                                                      |
|--------------|----------|------------------------|-------------------------------------------------------------|------------|---------------------|-----|------|----------------------------------------------------------------------------------------------------------------|----------|--------------------------------------------------------------------------------------|
| Oh 2019      | 31215475 | Peak NSE > 68.49 ng/mL | Immediately after ROSC and repeated 24, 48, and 72 h later. | 0.43       | CPC 3-5 at 6 months | 160 | 0.70 | Sensitivity 60.7% (95%CI 51.0–69.8), Specificity 100% (95% CI 92.6–100.0). AUC of NSE 0.91 (95% CI, 0.86–0.95) | Moderate | Study participation moderate, Study confounding moderate                             |
| Devaux 2016  | 27438111 | NSE (both)             | 48 h after ROSC                                             | continuous | CPC 3-5 at 6 months | 579 | 0.53 | OR 37.47 (5.16-271.9)                                                                                          | Moderate | Study participation moderate, Self-fulfilling prophecy moderate. TTM trial substudy. |
| Stammet 2015 | 25975474 | serum NSE at 24        | 24, 48, 72h post ROSC                                       | continuous | CPC 3-5 at 6 months | 686 | 0.49 | OR 0.97 (0.95-0.99)                                                                                            | Moderate | Study participation moderate, Self fulfilling prophecy moderate. TTM trial substudy. |
| Stammet 2015 | 25975474 | serum NSE at 48        | 24, 48, 72h post ROSC                                       | continuous | CPC 3-5 at 6 months | 686 | 0.49 | OR 1.04 (1.01-1.07). Cutoff of 33 ng/ml at 48 h yielded Specificity 91% and Sensitivity 65%                    | Moderate | Study participation moderate, Self fulfilling prophecy moderate. TTM trial substudy. |

## Neuron Specific Enolase (NSE) as a predictor of functional outcome

|                           |          |                                                                       |                                    |                |                        |     |      |                                                                                                                                                                                                                              |          |                                                                                                                                                 |
|---------------------------|----------|-----------------------------------------------------------------------|------------------------------------|----------------|------------------------|-----|------|------------------------------------------------------------------------------------------------------------------------------------------------------------------------------------------------------------------------------|----------|-------------------------------------------------------------------------------------------------------------------------------------------------|
| Stammet<br>2015           | 25975474 | serum NSE at<br>72h                                                   | 24, 48, 72h<br>post ROSC           | continuo<br>us | CPC 3-5 at 6<br>months | 686 | 0.49 | OR 1.07 (1.033-1.105)                                                                                                                                                                                                        | Moderate | Study<br>participatio<br>n moderate,<br>Self fulfilling<br>prophecy<br>moderate.<br>TTM trial<br>substudy.                                      |
| Reisinger<br>2007         | 17060343 | Peak NSE for<br>persistent<br>coma poor<br>outcome at<br>6 mo (CPC 4) | highest during<br>the first 4 days | continuo<br>us | CPC 4 at 6<br>months   | 177 | 0.33 | OR 1.07 (1.04-1.11)                                                                                                                                                                                                          | Moderate | Study<br>confounding<br>moderate,<br>Self-fulfilling<br>prophecy<br>moderate                                                                    |
| Moseby-<br>Knappe<br>2021 | 34417831 | NSE                                                                   | 24, 48, 72h<br>post ROSC           | Continuo<br>us | CPC 3-5 at 6<br>months | 717 | 0.50 | NSE 24h: sensitivity 85%<br>(80.7–88.5) specificity<br>46.4% (41.1–51.8); 48h:<br>sensitivity 83.6%<br>(78.9–87.4) specificity<br>57.5% (52.3–63); 72h:<br>sensitivity 80.4%<br>(75.2–84.7) specificity<br>74.9% (69.8–79.4) | Moderate | Study<br>participatio<br>n moderate,<br>Study<br>confounding<br>moderate,<br>Self-fulfilling<br>prophecy<br>moderate.<br>TTM trial<br>substudy. |
| Zellner<br>2013           | 23528678 | NSE                                                                   | Admission, day<br>1, day 2         | Continuo<br>us | CPC 3-5 at 6<br>months | 123 | 0.5  | NSE >33 day 1-2:<br>Sensitivity 84% (71–92),<br>Specificity 76% (63–86)                                                                                                                                                      | Moderate | Study<br>confounding<br>moderate,<br>Self fulfilling<br>prophecy<br>moderate                                                                    |



## Neuron Specific Enolase (NSE) as a predictor of mortality

| FIRST AUTHOR LAST NAME | PMID     | PROGNOSTIC FACTOR(S) EVALUATED | Timing of prognostic factor evaluation | Prevalence % of the predictor | OUTCOME                          | Sample size for the outcome | Prevalence % of the outcome | EFFECT SIZE WITH 95% CI as reported in the study (False Positive Rate, Sensitivity, Specificity, Odds Ratio, Relative Risk)                                                                                                                                                                                                          | OVERALL RISK OF BIAS FOR THE STUDY | Overall risk of bias: Comments |
|------------------------|----------|--------------------------------|----------------------------------------|-------------------------------|----------------------------------|-----------------------------|-----------------------------|--------------------------------------------------------------------------------------------------------------------------------------------------------------------------------------------------------------------------------------------------------------------------------------------------------------------------------------|------------------------------------|--------------------------------|
| Luescher 2019          | 31306716 | NSE                            | 72h from ROSC                          | Continuous                    | Mortality in-hospital, all-cause | 336                         | 0.46                        | AUC 0.88 (95%CI 0.83–0.94). NSE>33: Sensitivity 83% (72–91); Specificity 73% (64–81); PPV 64% (54–74); NPV 88% (79–93). NSE>47.8: Sensitivity 79% (67.1–87.5); Specificity 85% (77–91); PPV 75% (64–85); NPV 87% (79–92). NSE on days 0, 1, 2, 5 or 7 were less predictive and delta NSE between any 2 time points was not superior. | High                               | Self fulfilling prophecy high  |

## Neuron Specific Enolase (NSE) as a predictor of mortality

|             |          |     |                       |            |                       |     |               |                                                                                                |          |                                                                                      |
|-------------|----------|-----|-----------------------|------------|-----------------------|-----|---------------|------------------------------------------------------------------------------------------------|----------|--------------------------------------------------------------------------------------|
| Devaux 2016 | 27438111 | NSE | 48 h after ROSC       | continuous | mortality 6 months    | 579 | Not available | OR 1.37 (1.23-1.53)                                                                            | Moderate | Study participation moderate, Self-fulfilling prophecy moderate. TTM trial substudy. |
| Grubb 2007  | 17502328 | NSE | 24-48 hrs post arrest | continuous | in-hospital mortality | 133 | 0.58          | Statistically significant in multivariate analysis, OR not stated. AUC 0.81, 95% CI not stated | High     | Statistical analysis moderate, Self-fulfilling prophecy high                         |

## Clinical prediction models- Functional outcome

| FIRST AUTHOR LAST NAME | PMID     | OHCA/ IHCA/ Both | PROGNOSTIC MODEL(S) EVALUATED | OUTCOME             | Sample size for the outcome of interest | Proportion of patients with the outcome of interest | Discrimination: C-statistic/ Area under the curve with 95% CI | Calibration: Predicted to observed, Hosmer-Lemeshow or other, or enter "Not reported" | Any other reported effect size (Odds Ratio, 95% CI etc)- enter as comment           | Development vs Validation of model | External validation study? | Overall risk of bias | Comments: Overall Risk of Bias                     | Overall concern about applicability |
|------------------------|----------|------------------|-------------------------------|---------------------|-----------------------------------------|-----------------------------------------------------|---------------------------------------------------------------|---------------------------------------------------------------------------------------|-------------------------------------------------------------------------------------|------------------------------------|----------------------------|----------------------|----------------------------------------------------|-------------------------------------|
| Velly 2018             | 29500154 | OHCA and IHCA    | OHCA                          | CPC 3-5 at 6 months | 150                                     | 0.78                                                | Cutoff $\geq 58$ AUC 0.57 (0.46–0.68)                         |                                                                                       | Specificity 100% (89–100), Sensitivity 2% (0–6), PPV 100% (16–100), NPV 22% (16–30) | Both                               | Yes                        | UNCLEAR              |                                                    | LOW                                 |
| Song 2021              | 33922191 | OHCA             | OHCA                          | CPC 3-5 at 3 months | 106                                     | 0.58                                                | 0.86 (0.78–0.92)                                              |                                                                                       | Sensitivity 25% (14.7–37.9), Specificity 100% (92–100)                              | Validation                         | Yes                        | UNCLEAR              | Analysis unclear, Self-fulfilling prophecy unclear | LOW                                 |
| Song 2021              | 33922191 | OHCA             | CAHP                          | CPC 3-5 at 3 months | 106                                     | 0.58                                                | 0.80 (0.71–0.87)                                              |                                                                                       | Sensitivity 5% (1.0–13.9), Specificity 100% (92–100)                                | Validation                         | Yes                        | UNCLEAR              | Analysis unclear, Self-fulfilling prophecy unclear | LOW                                 |

## Clinical prediction models- Mortality

| FIRST<br>AUTHOR<br>LAST NAME | PMID     | OHCA/ IHCA/<br>Both             | PROGNOSTIC<br>MODEL(S)<br>EVALUATED | OUTCOME                                | Sample<br>size for<br>the<br>outcome<br>of interest | Proportion<br>of patients<br>with the<br>outcome of<br>interest | Discrimination:<br>C-statistic/<br>Area under the<br>curve with 95%<br>CI | Calibration:<br>Predicted to<br>observed,<br>Hosmer-<br>Lemeshow or<br>other, or<br>enter "Not<br>reported" | Any other<br>reported effect<br>size (Odds Ratio,<br>95% CI etc)- enter<br>as comment                                                                               | Development<br>vs Validation<br>of model | External<br>validation<br>study? | Overall<br>risk of<br>bias | Comments:<br>Overall Risk<br>of Bias | Overall<br>concern<br>about<br>applicability |
|------------------------------|----------|---------------------------------|-------------------------------------|----------------------------------------|-----------------------------------------------------|-----------------------------------------------------------------|---------------------------------------------------------------------------|-------------------------------------------------------------------------------------------------------------|---------------------------------------------------------------------------------------------------------------------------------------------------------------------|------------------------------------------|----------------------------------|----------------------------|--------------------------------------|----------------------------------------------|
| Isenschmid<br>2019           | 30391369 | OHCA and<br>unwitnessed<br>IHCA | OHCA                                | Mortality, in-<br>house, all-<br>cause | 349                                                 | 0.49                                                            | AUC 0.80<br>(95%CI 0.75-<br>0.85)                                         | Goodness of fit<br>with no<br>evidence of<br>miscalibration,<br>p=0.1                                       | Sensitivity/<br>Specificity/ PPV/<br>NPV% for different<br>cutoffs: 20-<br>81/64/68/78, 40-<br>41/94/87/63, 60-<br>2/100/100/52,<br>Youden index 27-<br>67/80/76/72 | Validation                               | Yes                              | UNCLEAR                    | Self fulfilling<br>prophecy<br>high  | LOW                                          |
| Isenschmid<br>2019           | 30391369 | OHCA and<br>unwitnessed<br>IHCA | CAHP                                | Mortality, in-<br>house, all-<br>cause | 349                                                 | 0.49                                                            | AUC 0.84<br>(95%CI 0.79-<br>0.88)                                         | Goodness of fit<br>with no<br>evidence of<br>miscalibration,<br>p=0.76                                      | Sensitivity/<br>Specificity/ PPV/<br>NPV% for different<br>cutoffs: >150-<br>82/72/73/81, >200-<br>39/91/81/61,<br>Youden index 161-<br>77/81/81/77                 | Validation                               | Yes                              | HIGH                       |                                      | LOW                                          |

## Clinical prediction models- Mortality

|                  |          |                                 |      |                                        |     |      |                        |  |                                                                                                                                                                                                                                                                                                                                                                                                                                                                                                                                                                                                                         |            |     |         |                                     |     |
|------------------|----------|---------------------------------|------|----------------------------------------|-----|------|------------------------|--|-------------------------------------------------------------------------------------------------------------------------------------------------------------------------------------------------------------------------------------------------------------------------------------------------------------------------------------------------------------------------------------------------------------------------------------------------------------------------------------------------------------------------------------------------------------------------------------------------------------------------|------------|-----|---------|-------------------------------------|-----|
| Luescher<br>2019 | 31306716 | OHCA and<br>unwitnessed<br>IHCA | OHCA | Mortality, in-<br>house, all-<br>cause | 336 | 0.46 | AUC 0.79, no<br>95% CI |  | Adding NSE day 3<br>levels improved<br>AUC to 0.89.<br>Adding NSE day 3<br>to OHCA resulted<br>in a Net<br>Reclassification<br>Index (NRI) of 0.64<br>( $p < 0.001$ ) for<br>OHCA (among<br>patients with poor<br>outcome, adding<br>NSE increased the<br>risk in the<br>statistical model<br>in 44%, while<br>decreasing the<br>risk in 17%; and<br>among patients<br>with favorable<br>outcome, adding<br>NSE decreased the<br>risk of the model<br>in 52% while<br>increasing it in<br>15%. Adding NSE<br>day 3 to OHCA<br>resulted in an<br>integrated<br>Discrimination<br>Index (IDI) of 0.18<br>( $p < 0.001$ ). | Validation | Yes | UNCLEAR | Self fulfilling<br>prophecy<br>high | LOW |
|------------------|----------|---------------------------------|------|----------------------------------------|-----|------|------------------------|--|-------------------------------------------------------------------------------------------------------------------------------------------------------------------------------------------------------------------------------------------------------------------------------------------------------------------------------------------------------------------------------------------------------------------------------------------------------------------------------------------------------------------------------------------------------------------------------------------------------------------------|------------|-----|---------|-------------------------------------|-----|

## Clinical prediction models- Mortality

|               |          |                           |       |                                |     |      |                     |  |                                                                                                                                                                                                                                                                                                                                                                                                                                                                                                                            |            |     |         |                                                    |     |
|---------------|----------|---------------------------|-------|--------------------------------|-----|------|---------------------|--|----------------------------------------------------------------------------------------------------------------------------------------------------------------------------------------------------------------------------------------------------------------------------------------------------------------------------------------------------------------------------------------------------------------------------------------------------------------------------------------------------------------------------|------------|-----|---------|----------------------------------------------------|-----|
| Luescher 2019 | 31306716 | OHCA and unwitnessed IHCA | CAHP  | Mortality, in-house, all-cause | 336 | 0.46 | AUC 0.81, no 95% CI |  | Adding NSE day 3 levels improved AUC to 0.91. Adding NSE day 3 to OHCA resulted in a Net Reclassification Index (NRI) of 0.75 ( $p < 0.001$ ) for OHCA (among patients with poor outcome, adding NSE increased the risk in the statistical model in 47%, while decreasing the risk in 17%; and among patients with favorable outcome, adding NSE decreased the risk of the model in 59% while increasing it in 14%. Adding NSE day 3 to CAHP resulted in an integrated Discrimination Index (IDI) of 0.25 ( $p < 0.001$ ). | Validation | Yes | HIGH    | Self fulfilling prophecy ROB high                  | LOW |
| Rubins 2019   | 31512185 | IHCA                      | GOFAR | Survival to discharge          | 403 | 0.19 |                     |  | GO-FAR $\geq 24$ (Very low survival)- 3/60 (5%) survived; 14–23 (Low survival)- 5/90 (5.5%) survived.                                                                                                                                                                                                                                                                                                                                                                                                                      | Validation | Yes | UNCLEAR | Analysis unclear, Self fulfilling prophecy unclear | LOW |

Clinical prediction models- Mortality

|                  |          |      |      |                           |     |      |                           |                                |  |            |     |         |                                        |     |
|------------------|----------|------|------|---------------------------|-----|------|---------------------------|--------------------------------|--|------------|-----|---------|----------------------------------------|-----|
| Hunziker<br>2011 | 21494106 | OHCA | OHCA | Mortality at<br>discharge | 128 | 0.77 | 0.85 (95%CI<br>0.78-0.91) | Hosmer-<br>Lemeshow C<br>p=0.4 |  | Validation | Yes | UNCLEAR | Self-fulfilling<br>prophecy<br>unclear | LOW |
|------------------|----------|------|------|---------------------------|-----|------|---------------------------|--------------------------------|--|------------|-----|---------|----------------------------------------|-----|
